# Supplementary material for: Impact of low- and high-molecular-mass components of human serum on NAMI-A binding to transferrin
Source: PubMed Central journal article supplement (PMC4436686; doi:10.1007/s00775-015-1255-5), 2015-03-20
Supplement: 775_2015_1255_MOESM1_ESM.pdf [file 775_2015_1255_MOESM1_ESM.pdf]

# Electronic Supplementary Material

## Bio-activation of 4-Alkyl Analogues of 1,4-Dihydropyridine Mediated by Cytochrome P450 Enzymes

Xiao-Xi Li,<sup>1</sup> Xiaoqian Zhang,<sup>2</sup> Qing-Chuan Zheng,<sup>1</sup> Yong Wang<sup>3,✉</sup>

---

<sup>1</sup> Xiao-Xi Li, Qing-Chuan Zheng

International Joint Research Laboratory of Nano-Micro Architecture Chemistry, State Key Laboratory of Theoretical and Computational Chemistry, Institute of Theoretical Chemistry, Jilin University, Changchun 130023, People's Republic of China

<sup>2</sup> Xiaoqian Zhang

College of Physics and Electronic Engineer, Henan Normal University, Xinxiang 453007, People's Republic of China

<sup>3</sup> Yong Wang (✉)

State Key Laboratory for Oxo Synthesis and Selective Oxidation, Lanzhou Institute of Chemical Physics, Chinese Academy of Sciences, Lanzhou 730000, China

Email: wangyong@licp.cas.cn

## Part I Proposed metabolic mechanisms

**Scheme S1** All possible metabolic pathways for the oxidation of 4-alkyl substituted 3,5-bis(ethoxycarbonyl)-2,6-dimethyl-1,4-dihydropyridine by Cpd I.

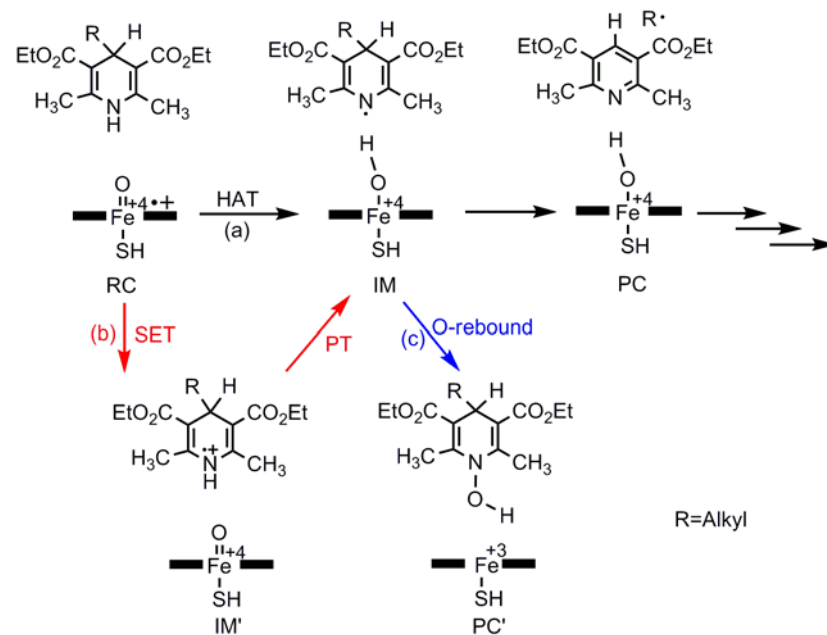

## Part II The metabolism of DDEP by Cpd I

**Table S1** Mulliken group spin densities and NBO charges for key moieties during the deethylation of DDEP by Cpd I of P450. All data were computed at the UB3LYP/B1 level. The total<sub>ox</sub> represents the NBO charges on the Cpd I moiety, while the total<sub>sub</sub> represents the NBO charges on the substrate group.

|                  | Mulliken spin densities |      |       |       |       |       |        | NBO charges |       |       |       |      |       |        | total <sub>ox</sub> | total <sub>sub</sub> |
|------------------|-------------------------|------|-------|-------|-------|-------|--------|-------------|-------|-------|-------|------|-------|--------|---------------------|----------------------|
|                  | Fe                      | O    | Por   | SH    | H     | Et    | others | Fe          | O     | Por   | SH    | H    | Et    | others |                     |                      |
| <sup>4</sup> RC  | 1.17                    | 0.85 | 0.47  | 0.50  | 0.00  | 0.00  | 0.02   | 0.31        | -0.29 | 0.07  | -0.07 | 0.45 | 0.02  | -0.48  | 0.02                | -0.02                |
| <sup>2</sup> RC  | 1.29                    | 0.81 | -0.55 | -0.56 | 0.00  | 0.00  | 0.00   | 0.32        | -0.30 | 0.07  | -0.06 | 0.45 | 0.01  | -0.49  | 0.03                | -0.03                |
| <sup>4</sup> TS1 | 1.50                    | 0.55 | 0.05  | 0.13  | -0.01 | 0.07  | 0.71   | 0.35        | -0.54 | -0.19 | -0.12 | 0.48 | 0.07  | -0.04  | -0.51               | 0.51                 |
| <sup>2</sup> TS1 | 1.62                    | 0.50 | -0.30 | -0.09 | 0.00  | -0.07 | -0.66  | 0.37        | -0.56 | -0.15 | -0.16 | 0.48 | 0.07  | -0.06  | -0.50               | 0.50                 |
| <sup>4</sup> IM  | 1.74                    | 0.29 | -0.12 | 0.09  | 0.00  | 0.09  | 0.91   | 0.39        | -0.65 | -0.22 | -0.05 | 0.50 | 0.08  | -0.04  | -0.54               | 0.54                 |
| <sup>2</sup> IM  | 1.74                    | 0.29 | -0.12 | 0.09  | 0.01  | -0.09 | -0.91  | 0.39        | -0.65 | -0.22 | -0.05 | 0.50 | 0.08  | -0.04  | -0.54               | 0.54                 |
| <sup>4</sup> TS2 | 1.74                    | 0.30 | -0.12 | 0.08  | 0.00  | 0.68  | 0.32   | 0.39        | -0.65 | -0.23 | -0.06 | 0.50 | 0.11  | -0.07  | -0.54               | 0.54                 |
| <sup>2</sup> TS2 | 1.74                    | 0.30 | -0.12 | 0.08  | 0.00  | -0.68 | -0.31  | 0.39        | -0.65 | -0.23 | -0.06 | 0.50 | 0.11  | -0.07  | -0.54               | 0.54                 |
| <sup>4</sup> PC  | 1.75                    | 0.29 | -0.12 | 0.07  | 0.00  | 0.99  | 0.01   | 0.40        | -0.66 | -0.22 | -0.05 | 0.50 | 0.00  | 0.03   | -0.54               | 0.54                 |
| <sup>2</sup> PC  | 1.75                    | 0.29 | -0.12 | 0.08  | 0.00  | -0.99 | 0.00   | 0.39        | -0.66 | -0.22 | -0.05 | 0.50 | -0.01 | 0.04   | -0.53               | 0.53                 |

**Table S2** The deethylation of DDEP mediated by Cpd I. SCF energies at various computational levels. Absolute SCF energies are in Hartree and relative SCF energies are in kcal/mol.

|                  | OPT/B1       |      | OPT/B1+ZPE   |      | SPE/B2       |      | SPE/B2+ZPE   |      | SOLV         |      | SOLV+ZPE     |      |
|------------------|--------------|------|--------------|------|--------------|------|--------------|------|--------------|------|--------------|------|
| <sup>4</sup> RC  | -2526.917185 | 0.0  | -2526.260945 | 0.0  | -2527.544813 | 0.0  | -2526.888573 | 0.0  | -2527.564330 | 0.0  | -2526.908090 | 0.0  |
| <sup>2</sup> RC  | -2526.917284 | -0.1 | -2526.261064 | -0.1 | -2527.544994 | -0.1 | -2526.888774 | -0.1 | -2527.564440 | -0.1 | -2526.908220 | -0.1 |
| <sup>4</sup> TS1 | -2526.900862 | 10.2 | -2526.251503 | 5.9  | -2527.532930 | 7.5  | -2526.883571 | 3.1  | -2527.553134 | 7.0  | -2526.903775 | 2.7  |
| <sup>2</sup> TS1 | -2526.900595 | 10.4 | -2526.250903 | 6.3  | -2527.532658 | 7.6  | -2526.882966 | 3.5  | -2527.553092 | 7.1  | -2526.903400 | 2.9  |
| <sup>4</sup> IM  | -2526.914865 | 1.5  | -2526.261221 | -0.2 | -2527.548832 | -2.5 | -2526.895188 | -4.2 | -2527.567235 | -1.8 | -2526.913591 | -3.5 |
| <sup>2</sup> IM  | -2526.914844 | 1.5  | -2526.261200 | -0.2 | -2527.548822 | -2.5 | -2526.895178 | -4.2 | -2527.567231 | -1.8 | -2526.913587 | -3.4 |
| <sup>4</sup> TS2 | -2526.891248 | 16.3 | -2526.240670 | 12.7 | -2527.527073 | 11.1 | -2526.876495 | 7.6  | -2527.546036 | 11.5 | -2526.895458 | 7.9  |
| <sup>2</sup> TS2 | -2526.891245 | 16.3 | -2526.240671 | 12.7 | -2527.527074 | 11.1 | -2526.876500 | 7.6  | -2527.546041 | 11.5 | -2526.895467 | 7.9  |
| <sup>4</sup> PC  | -2526.904260 | 8.1  | -2526.255944 | 3.1  | -2527.542493 | 1.5  | -2526.894177 | -3.5 | -2527.559638 | 2.9  | -2526.911322 | -2.0 |
| <sup>2</sup> PC  | -2526.903076 | 8.9  | -2526.254767 | 3.9  | -2527.540960 | 2.4  | -2526.892651 | -2.6 | -2527.559308 | 3.2  | -2526.910999 | -1.8 |

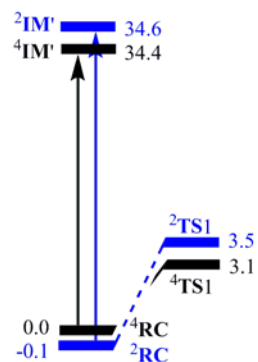

**Fig. S1** Energy profiles (in kcal/mol) for the initial H-abstraction process during the N-deethylation of DDEP by Cpd I on the quartet and doublet spin states in vacuum. All energy data are calculated at the UB3LYP/B2//B1 level, including zero point vibrational energy (ZPE) correction.

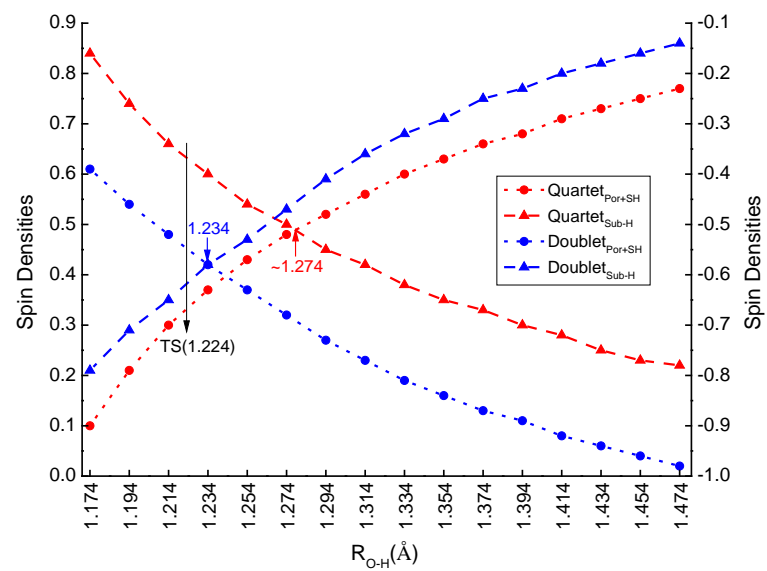

**Fig. S2** Changes in the spin densities ( $\rho$ ) on Porphine+thiolate (Por+SH, dot line) and Substrate-hydrogen (Sub-H, dash line) moieties as a function of the O-H distance (red for quartet spin state, blue for doublet spin state). The spin density on Fe-O moiety keeps *ca.* 2.0.

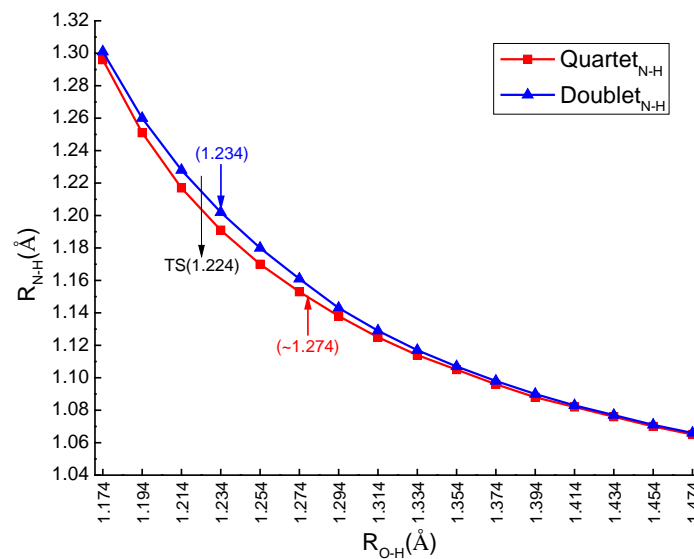

**Fig. S3** Change of the N-H distance as a function of the O-H distance (red for quartet spin state, blue for doublet spin state). All distances are in Å.

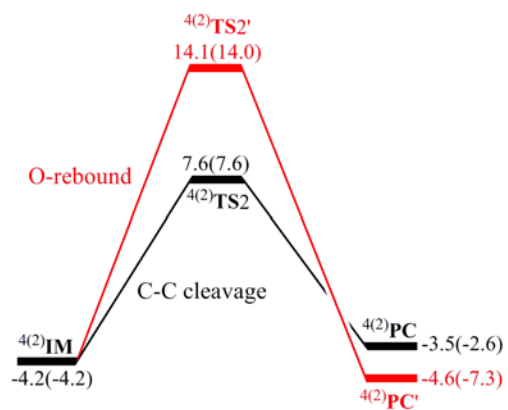

**Fig. S4** Energy profiles (in kcal/mol) for the homolytic scission of C-C bond (in black) and O-rebound processes (in red) during the deethylation reaction of DDEP calculated with UB3LYP/B2//B1 on the quartet (doublet) state in vacuum. All energy data include zero point vibrational energy (ZPE) correction.

## Part III The effects of substituent at 4-carbon on the reaction

### III-1. The metabolism of DDC by Cpd I

**Table S3** Mulliken group spin densities and NBO charges for key moieties during the demethylation of DDC by Cpd I of P450. All data were computed at the UB3LYP/B1 level. The total<sub>ox</sub> represents the NBO charges on the Cpd I moiety, while the total<sub>sub</sub> represents the NBO charges on the substrate group.

|                  | Mulliken spin densities |      |       |       |       |       |        | NBO charges |       |       |       |      |       |        | total <sub>ox</sub> | total <sub>sub</sub> |
|------------------|-------------------------|------|-------|-------|-------|-------|--------|-------------|-------|-------|-------|------|-------|--------|---------------------|----------------------|
|                  | Fe                      | O    | Por   | SH    | H     | Et    | others | Fe          | O     | Por   | SH    | H    | Et    | others |                     |                      |
| <sup>4</sup> RC  | 1.17                    | 0.85 | 0.47  | 0.50  | 0.00  | 0.00  | 0.01   | 0.31        | -0.29 | 0.08  | -0.06 | 0.45 | 0.02  | -0.49  | 0.03                | -0.03                |
| <sup>2</sup> RC  | 1.30                    | 0.80 | -0.55 | -0.55 | 0.00  | 0.00  | 0.01   | 0.32        | -0.30 | 0.07  | -0.06 | 0.45 | 0.02  | -0.49  | 0.03                | -0.03                |
| <sup>4</sup> TS1 | 1.50                    | 0.55 | 0.05  | 0.13  | -0.01 | 0.06  | 0.72   | 0.34        | -0.54 | -0.18 | -0.13 | 0.48 | 0.07  | -0.04  | -0.50               | 0.50                 |
| <sup>2</sup> TS1 | 1.56                    | 0.52 | -0.33 | -0.02 | 0.00  | -0.06 | -0.67  | 0.35        | -0.55 | -0.14 | -0.17 | 0.48 | 0.07  | -0.05  | -0.50               | 0.50                 |
| <sup>4</sup> IM  | 1.74                    | 0.29 | -0.12 | 0.08  | 0.00  | 0.08  | 0.93   | 0.39        | -0.65 | -0.22 | -0.05 | 0.50 | 0.07  | -0.04  | -0.54               | 0.54                 |
| <sup>2</sup> IM  | 1.74                    | 0.29 | -0.12 | 0.08  | 0.01  | -0.08 | -0.92  | 0.40        | -0.65 | -0.22 | -0.05 | 0.50 | 0.07  | -0.04  | -0.54               | 0.54                 |
| <sup>4</sup> TS2 | 1.74                    | 0.30 | -0.12 | 0.08  | 0.00  | 0.73  | 0.28   | 0.39        | -0.65 | -0.23 | -0.05 | 0.50 | 0.07  | -0.04  | -0.54               | 0.54                 |
| <sup>2</sup> TS2 | 1.74                    | 0.30 | -0.12 | 0.08  | 0.00  | -0.73 | -0.27  | 0.39        | -0.65 | -0.23 | -0.05 | 0.50 | 0.07  | -0.04  | -0.54               | 0.54                 |
| <sup>4</sup> PC  | 1.75                    | 0.29 | -0.12 | 0.08  | 0.00  | 1.00  | 0.01   | 0.40        | -0.66 | -0.22 | -0.05 | 0.50 | -0.01 | 0.04   | -0.53               | 0.53                 |
| <sup>2</sup> PC  | 1.75                    | 0.29 | -0.12 | 0.08  | 0.00  | -1.00 | 0.00   | 0.40        | -0.66 | -0.22 | -0.05 | 0.50 | -0.01 | 0.04   | -0.53               | 0.53                 |

**Table S4** The demethylation of DDC by Cpd I of P450. SCF energies at various computational levels. Absolute SCF energies are in Hartree and relative SCF energies are in kcal/mol.

|                  | OPT/B1       |       | OPT/B1+ZPE   |       | SPE/B2       |       | SPE/B2+ZPE   |       | SOLV         |      | SOLV+ZPE     |      |
|------------------|--------------|-------|--------------|-------|--------------|-------|--------------|-------|--------------|------|--------------|------|
| <sup>4</sup> RC  | -2487.606652 | 0.00  | -2486.978937 | 0.00  | -2488.222238 | 0.00  | -2487.594523 | 0.00  | -2488.241420 | 0.0  | -2487.613705 | 0.0  |
| <sup>2</sup> RC  | -2487.606747 | -0.06 | -2486.979027 | -0.06 | -2488.222341 | -0.06 | -2487.594621 | -0.06 | -2488.241519 | -0.1 | -2487.613799 | -0.1 |
| <sup>4</sup> TS1 | -2487.590850 | 9.92  | -2486.969780 | 5.75  | -2488.211894 | 6.49  | -2487.590824 | 2.32  | -2488.231762 | 6.1  | -2487.610692 | 1.9  |
| <sup>2</sup> TS1 | -2487.590322 | 10.25 | -2486.969159 | 6.14  | -2488.211237 | 6.90  | -2487.590074 | 2.79  | -2488.231773 | 6.1  | -2487.610610 | 1.9  |
| <sup>4</sup> IM  | -2487.604891 | 1.10  | -2486.979458 | -0.33 | -2488.227769 | -3.47 | -2487.602336 | -4.90 | -2488.245988 | -2.9 | -2487.620555 | -4.3 |
| <sup>2</sup> IM  | -2487.604874 | 1.12  | -2486.979446 | -0.32 | -2488.227764 | -3.47 | -2487.602336 | -4.90 | -2488.245991 | -2.9 | -2487.620563 | -4.3 |
| <sup>4</sup> TS2 | -2487.573781 | 20.63 | -2486.952260 | 16.74 | -2488.199074 | 14.54 | -2487.577553 | 10.65 | -2488.217499 | 15.0 | -2487.595978 | 11.1 |
| <sup>2</sup> TS2 | -2487.573779 | 20.63 | -2486.952257 | 16.74 | -2488.199077 | 14.53 | -2487.577555 | 10.65 | -2488.217504 | 15.0 | -2487.595982 | 11.1 |
| <sup>4</sup> PC  | -2487.584245 | 14.06 | -2486.965432 | 8.47  | -2488.211997 | 6.43  | -2487.593184 | 0.84  | -2488.230142 | 7.1  | -2487.611329 | 1.5  |
| <sup>2</sup> PC  | -2487.584245 | 14.06 | -2486.965427 | 8.48  | -2488.211996 | 6.43  | -2487.593178 | 0.84  | -2488.230137 | 7.1  | -2487.611319 | 1.5  |



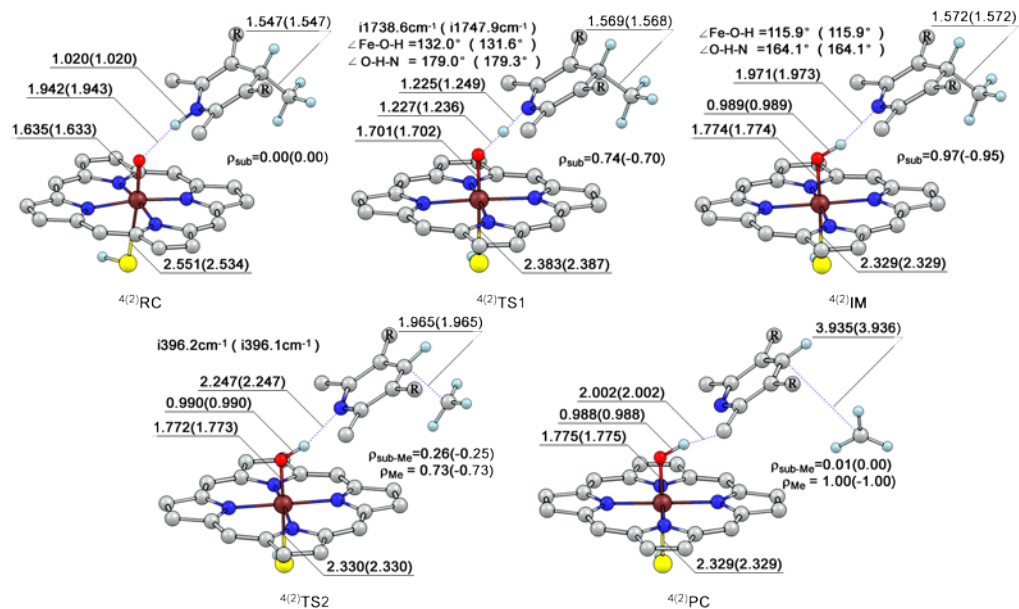

**Fig. S5** Conformations of various reaction species (lengths in Å) optimized at the UB3LYP/B1 level. For  $^{4(2)}\text{TSs}$ , imaginary frequencies (in  $\text{cm}^{-1}$ ) were included. Some important angles (in  $^\circ$ ) and part of group spin densities ( $\rho$ ) were included. Each data set gives HS and LS values. Unimportant hydrogen atoms are omitted for clarity. R is equal to ethoxycarbonyl group.

### III-2. The metabolism of DDIP by Cpd I

**Table S5** Mulliken group spin densities and NBO charges for key moieties during the deisopropylation of DDIP by Cpd I of P450. All data were computed at the UB3LYP/B1 level. The total<sub>ox</sub> represents the NBO charges on the Cpd I moiety, while the total<sub>sub</sub> represents the NBO charges on the substrate group.

|                  | Mulliken spin densities |      |       |       |       |       |        | NBO charges |       |       |       |      |       |        | total <sub>ox</sub> | total <sub>sub</sub> |
|------------------|-------------------------|------|-------|-------|-------|-------|--------|-------------|-------|-------|-------|------|-------|--------|---------------------|----------------------|
|                  | Fe                      | O    | Por   | SH    | H     | Et    | others | Fe          | O     | Por   | SH    | H    | Et    | others |                     |                      |
| <sup>4</sup> RC  | 1.17                    | 0.85 | 0.47  | 0.50  | 0.00  | 0.00  | 0.01   | 0.31        | -0.29 | 0.08  | -0.06 | 0.45 | 0.01  | -0.49  | 0.03                | -0.03                |
| <sup>2</sup> RC  | 1.30                    | 0.80 | -0.55 | -0.56 | 0.00  | 0.00  | 0.01   | 0.32        | -0.30 | 0.07  | -0.06 | 0.45 | 0.01  | -0.49  | 0.03                | -0.03                |
| <sup>4</sup> TS1 | 1.53                    | 0.53 | 0.07  | 0.10  | -0.01 | 0.08  | 0.70   | 0.36        | -0.55 | -0.17 | -0.14 | 0.48 | 0.07  | -0.05  | -0.50               | 0.50                 |
| <sup>2</sup> TS1 | 1.61                    | 0.51 | -0.33 | -0.09 | 0.00  | -0.08 | -0.62  | 0.37        | -0.55 | -0.12 | -0.16 | 0.48 | 0.07  | -0.08  | -0.47               | 0.47                 |
| <sup>4</sup> IM  | 1.74                    | 0.29 | -0.12 | 0.08  | 0.00  | 0.11  | 0.90   | 0.39        | -0.65 | -0.22 | -0.05 | 0.50 | 0.08  | -0.05  | -0.54               | 0.54                 |
| <sup>2</sup> IM  | 1.74                    | 0.29 | -0.12 | 0.08  | 0.01  | -0.11 | -0.89  | 0.39        | -0.65 | -0.22 | -0.05 | 0.50 | 0.08  | -0.05  | -0.54               | 0.54                 |
| <sup>4</sup> TS2 | 1.74                    | 0.30 | -0.12 | 0.08  | 0.00  | 0.62  | 0.39   | 0.39        | -0.65 | -0.23 | -0.06 | 0.50 | 0.14  | -0.10  | -0.04               | 0.04                 |
| <sup>2</sup> TS2 | 1.74                    | 0.30 | -0.12 | 0.08  | 0.00  | -0.62 | -0.38  | 0.39        | -0.65 | -0.23 | -0.06 | 0.50 | 0.14  | -0.10  | -0.04               | 0.04                 |
| <sup>4</sup> PC  | 1.75                    | 0.29 | -0.12 | 0.08  | 0.00  | 1.00  | 0.01   | 0.40        | -0.66 | -0.22 | -0.05 | 0.50 | -0.01 | 0.04   | -0.03               | 0.03                 |
| <sup>2</sup> PC  | 1.75                    | 0.29 | -0.12 | 0.08  | 0.00  | -1.00 | 0.00   | 0.40        | -0.66 | -0.22 | -0.05 | 0.50 | -0.01 | 0.04   | -0.03               | 0.03                 |

**Table S6** The deisopropylation of DDIP by Cpd I of P450. SCF energies at various computational levels. Absolute SCF energies are in Hartree and relative SCF energies are in kcal/mol.

|                  | OPT/B1       | OPT/B1+ZPE | SPE/B2       | SPE/B2+ZPE | SOLV         | SOLV+ZPE |
|------------------|--------------|------------|--------------|------------|--------------|----------|
| <sup>4</sup> RC  | -2566.228820 | 0.00       | -2565.544219 | 0.00       | -2566.866419 | 0.00     |
| <sup>2</sup> RC  | -2566.228932 | -0.07      | -2565.544378 | -0.10      | -2566.866567 | -0.09    |
| <sup>4</sup> TS1 | -2566.210253 | 11.65      | -2565.532316 | 7.47       | -2566.853344 | 8.20     |
| <sup>2</sup> TS1 | -2566.210093 | 11.75      | -2565.532305 | 7.48       | -2566.853054 | 8.39     |
| <sup>4</sup> IM  | -2566.223961 | 3.05       | -2565.541683 | 1.59       | -2566.869036 | -1.64    |
| <sup>2</sup> IM  | -2566.223935 | 3.07       | -2565.541656 | 1.61       | -2566.869028 | -1.64    |
| <sup>4</sup> TS2 | -2566.207459 | 13.40      | -2565.527782 | 10.31      | -2566.853989 | 7.80     |
| <sup>2</sup> TS2 | -2566.207455 | 13.41      | -2565.527776 | 10.32      | -2566.853991 | 7.80     |
| <sup>4</sup> PC  | -2566.223240 | 3.50       | -2565.546018 | -1.13      | -2566.871891 | -3.43    |
| <sup>2</sup> PC  | -2566.223239 | 3.50       | -2565.546018 | -1.13      | -2566.871890 | -3.43    |

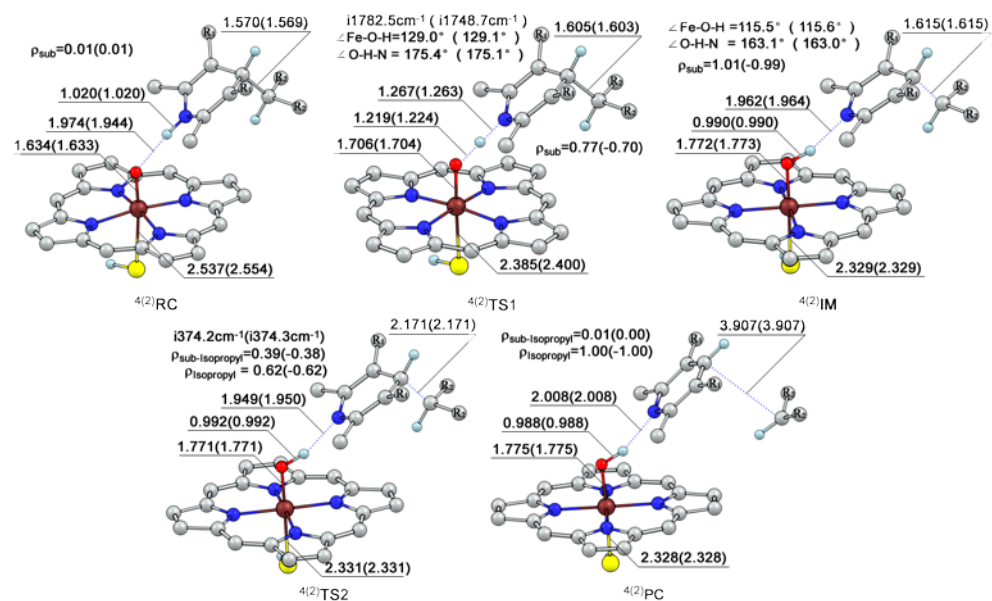

**Fig. S6** Conformations of various reaction species (lengths in Å) optimized at the UB3LYP/B1 level. For  $4(2)TS$ s, imaginary frequencies (in  $\text{cm}^{-1}$ ) were included. Some important angles (in  $^\circ$ ) and part of group spin densities ( $p$ ) were included. Each data set gives the quartet and doublet spin state values. Unimportant hydrogen atoms are omitted for clarity.  $R_1$  is equal to ethoxycarbonyl group and  $R_2$  is equal to methyl group.

**Table S7** N-H and C-C bond dissociation energies (in kcal/mol) of three substrates calculated at the UB3LYP/B2 level, with ZPE correction incorporated.

| Substrates | BDE <sub>N-H</sub> | BDE <sub>C-C</sub> |
|------------|--------------------|--------------------|
| DDC        | 81.7               | 54.2               |
| DDEP       | 82.3               | 50.2               |
| DDIP       | 83.7               | 45.6               |

## Part IV. Cartesian Coordinates of the Key

### Reaction Species.

#### A. Demethylation of DDC

| $^4\text{RC}$ |              |               |              | $^2\text{RC}$ |             |               |              |
|---------------|--------------|---------------|--------------|---------------|-------------|---------------|--------------|
| Fe            | 6.833490000  | -13.802129000 | 21.905324000 | Fe            | 6.855250000 | -13.817304000 | 21.905734000 |
| N             | 5.547276000  | -12.945931000 | 23.203470000 | N             | 5.596795000 | -12.970717000 | 23.235011000 |
| C             | 5.757867000  | -12.721727000 | 24.540748000 | C             | 5.830079000 | -12.768269000 | 24.571920000 |
| C             | 4.560650000  | -12.206327000 | 25.157890000 | C             | 4.646527000 | -12.255292000 | 25.216372000 |
| C             | 3.619001000  | -12.128722000 | 24.178022000 | C             | 3.689673000 | -12.156956000 | 24.253221000 |
| C             | 4.245924000  | -12.593843000 | 22.965164000 | C             | 4.293203000 | -12.608039000 | 23.023380000 |
| H             | 4.469817000  | -11.946048000 | 26.204515000 | H             | 4.574407000 | -12.010310000 | 26.268128000 |
| H             | 2.593658000  | -11.789876000 | 24.251513000 | H             | 2.667811000 | -11.813111000 | 24.348657000 |
| C             | 3.614045000  | -12.652146000 | 21.726163000 | C             | 3.637483000 | -12.648383000 | 21.796218000 |
| H             | 2.575682000  | -12.338033000 | 21.682489000 | H             | 2.599498000 | -12.330565000 | 21.777241000 |
| N             | 5.498925000  | -13.518914000 | 20.418354000 | N             | 5.493364000 | -13.503355000 | 20.441648000 |
| C             | 4.200751000  | -13.072918000 | 20.544314000 |               |             |               |              |
| C             | 3.528951000  | -13.127056000 | 19.269496000 |               |             |               |              |
| C             | 4.421617000  | -13.628195000 | 18.374311000 |               |             |               |              |
| C             | 5.644033000  | -13.878784000 | 19.096788000 |               |             |               |              |
| H             | 2.503976000  | -12.822249000 | 19.101724000 |               |             |               |              |
| H             | 4.282788000  | -13.819250000 | 17.318038000 |               |             |               |              |
| C             | 6.791242000  | -14.416857000 | 18.537383000 |               |             |               |              |
| H             | 6.761519000  | -14.666272000 | 17.481286000 |               |             |               |              |
| N             | 8.200229000  | -14.390862000 | 20.542984000 |               |             |               |              |
| C             | 7.985708000  | -14.639016000 | 19.211442000 |               |             |               |              |
| C             | 9.185858000  | -15.149716000 | 18.595166000 |               |             |               |              |
| C             | 10.133099000 | -15.206525000 | 19.569656000 |               |             |               |              |
| C             | 9.508537000  | -14.738690000 | 20.782785000 |               |             |               |              |
| H             | 9.274527000  | -15.419302000 | 17.550750000 |               |             |               |              |
| H             | 11.161548000 | -15.535009000 | 19.493944000 |               |             |               |              |
| C             | 10.140722000 | -14.670065000 | 22.014644000 |               |             |               |              |
| H             | 11.179523000 | -14.982121000 | 22.059392000 |               |             |               |              |
| N             | 8.260811000  | -13.810112000 | 23.329001000 |               |             |               |              |
| C             | 9.551450000  | -14.243978000 | 23.201085000 |               |             |               |              |
| C             | 10.233611000 | -14.183423000 | 24.470949000 |               |             |               |              |
| C             | 9.333923000  | -13.703120000 | 25.372316000 |               |             |               |              |
| C             | 8.108423000  | -13.470995000 | 24.647585000 |               |             |               |              |
| H             | 11.263960000 | -14.472391000 | 24.632401000 |               |             |               |              |
| H             | 9.470440000  | -13.516108000 | 26.429479000 |               |             |               |              |
| C             | 6.948116000  | -12.959020000 | 25.215282000 |               |             |               |              |
| H             | 6.972023000  | -12.732216000 | 26.276711000 |               |             |               |              |
| O             | 6.330273000  | -15.317734000 | 22.255834000 |               |             |               |              |
| S             | 7.528620000  | -11.502551000 | 21.098243000 |               |             |               |              |
| H             | 6.397739000  | -10.838923000 | 21.429267000 |               |             |               |              |
| C             | 6.954387000  | -17.630343000 | 25.229706000 |               |             |               |              |
| C             | 7.580309000  | -18.516603000 | 26.060010000 |               |             |               |              |
| C             | 8.876730000  | -19.185683000 | 25.614796000 |               |             |               |              |

|   |              |               |              |                  |              |               |              |
|---|--------------|---------------|--------------|------------------|--------------|---------------|--------------|
| C | 4.197962000  | -13.060071000 | 20.598500000 | H                | 6.935035000  | -16.828942000 | 23.296296000 |
| C | 3.498701000  | -13.106486000 | 19.338146000 | H                | 9.343089000  | -18.316249000 | 21.450532000 |
| C | 4.371734000  | -13.603120000 | 18.421269000 | H                | 7.849560000  | -19.214537000 | 21.349190000 |
| C | 5.609377000  | -13.857977000 | 19.116084000 | H                | 7.785484000  | -17.439178000 | 21.454201000 |
| H | 2.470396000  | -12.800767000 | 19.194112000 | H                | 5.510781000  | -16.096049000 | 24.688619000 |
| H | 4.209985000  | -13.788530000 | 17.367240000 | H                | 4.800188000  | -17.458082000 | 25.585755000 |
| C | 6.744529000  | -14.393142000 | 18.529738000 | H                | 5.785618000  | -16.299925000 | 26.444190000 |
| H | 6.692963000  | -14.635075000 | 17.472729000 | H                | 10.563557000 | -22.852491000 | 23.296883000 |
| N | 8.194886000  | -14.387643000 | 20.506862000 | H                | 11.965383000 | -21.783087000 | 23.320164000 |
| C | 7.951433000  | -14.624198000 | 19.177942000 | H                | 12.358135000 | -23.783860000 | 24.801051000 |
| C | 9.137129000  | -15.133235000 | 18.532718000 | H                | 12.322858000 | -22.296559000 | 25.772357000 |
| C | 10.104237000 | -15.201243000 | 19.486755000 | H                | 10.912403000 | -23.372173000 | 25.748418000 |
| C | 9.505956000  | -14.742305000 | 20.716387000 | H                | 6.220169000  | -20.405295000 | 29.292633000 |
| H | 9.203323000  | -15.394039000 | 17.484399000 | H                | 7.188733000  | -19.106946000 | 29.989215000 |
| H | 11.129779000 | -15.532363000 | 19.387076000 | H                | 7.855369000  | -21.328224000 | 30.973303000 |
| C | 10.162064000 | -14.686990000 | 21.936474000 | H                | 9.204973000  | -20.635993000 | 30.048071000 |
| H | 11.201309000 | -14.999948000 | 21.958228000 | H                | 8.229059000  | -21.941825000 | 29.348321000 |
| N | 8.305367000  | -13.846296000 | 23.297662000 | H                | 10.996918000 | -18.855664000 | 25.880796000 |
| C | 9.595314000  | -14.274759000 | 23.138247000 | H                | 10.014446000 | -18.303722000 | 27.255105000 |
| C | 10.302322000 | -14.227973000 | 24.394611000 | H                | 10.058026000 | -17.349107000 | 25.755418000 |
| C | 9.419523000  | -13.762703000 | 25.320315000 | <sup>4</sup> TS1 |              |               |              |
| C | 8.179200000  | -13.524847000 | 24.624008000 | Fe               | 6.916638000  | -14.012690000 | 21.947074000 |
| H | 11.336600000 | -14.515503000 | 24.531517000 | N                | 5.719587000  | -13.253454000 | 23.387380000 |
| H | 9.576965000  | -13.588567000 | 26.376757000 | C                | 6.013634000  | -13.117284000 | 24.719723000 |
| C | 7.030629000  | -13.021319000 | 25.221791000 | C                | 4.865037000  | -12.607655000 | 25.429714000 |
| H | 7.074748000  | -12.811451000 | 26.286027000 | C                | 3.873127000  | -12.450125000 | 24.510425000 |
| O | 6.333631000  | -15.334669000 | 22.209250000 | C                | 4.414401000  | -12.862330000 | 23.237687000 |
| S | 7.530256000  | -11.496260000 | 21.090239000 | H                | 4.838156000  | -12.406997000 | 26.493261000 |
| H | 6.408038000  | -10.837744000 | 21.458719000 | H                | 2.862606000  | -12.092640000 | 24.662300000 |
| C | 6.906554000  | -17.651880000 | 25.191186000 | C                | 3.699720000  | -12.866621000 | 22.046381000 |
| C | 7.531081000  | -18.524186000 | 26.037023000 | H                | 2.669349000  | -12.526713000 | 22.082512000 |
| C | 8.848950000  | -19.170668000 | 25.621510000 | N                | 5.465657000  | -13.720507000 | 20.577653000 |
| C | 8.915687000  | -19.311612000 | 24.103915000 | C                | 4.196172000  | -13.271722000 | 20.814904000 |
| C | 8.249700000  | -18.422255000 | 23.308871000 | C                | 3.436517000  | -13.257967000 | 19.584894000 |
| N | 7.379007000  | -17.522548000 | 23.897510000 | C                | 4.270282000  | -13.700513000 | 18.606147000 |
| C | 8.311009000  | -18.332290000 | 21.804907000 | C                | 5.539259000  | -13.983535000 | 19.238237000 |
| C | 5.685235000  | -16.820091000 | 25.490287000 | H                | 2.403976000  | -12.943141000 | 19.502698000 |
| C | 9.750454000  | -20.353262000 | 23.498028000 | H                | 4.067477000  | -13.825421000 | 17.550072000 |
| O | 9.935092000  | -20.550271000 | 22.303464000 | C                | 6.667332000  | -14.431766000 | 18.564344000 |
| O | 10.346111000 | -21.139092000 | 24.445028000 | H                | 6.581682000  | -14.586922000 | 17.493373000 |
| C | 11.168001000 | -22.205224000 | 23.941756000 | N                | 8.195827000  | -14.551185000 | 20.480895000 |
| C | 11.722213000 | -22.957780000 | 25.138934000 | C                | 7.901172000  | -14.686195000 | 19.149360000 |
| C | 6.972931000  | -18.780759000 | 27.368067000 | C                | 9.067453000  | -15.137403000 | 18.428874000 |
| O | 5.960202000  | -18.290125000 | 27.851598000 | C                | 10.066878000 | -15.272356000 | 19.343136000 |
| O | 7.728958000  | -19.678054000 | 28.069610000 | C                | 9.511488000  | -14.907643000 | 20.624508000 |
| C | 7.240154000  | -20.015139000 | 29.378413000 | H                | 9.099115000  | -15.319427000 | 17.362179000 |
| C | 8.190686000  | -21.041353000 | 29.970177000 | H                | 11.089480000 | -15.589952000 | 19.183778000 |
| C | 10.056427000 | -18.367821000 | 26.161680000 | C                | 10.216109000 | -14.942091000 | 21.821440000 |
| H | 8.900773000  | -20.166561000 | 26.064244000 | H                | 11.259441000 | -15.238720000 | 21.777220000 |

|   |              |               |              |                  |              |               |              |
|---|--------------|---------------|--------------|------------------|--------------|---------------|--------------|
| N | 8.408749000  | -14.215050000 | 23.313623000 | H                | 10.804405000 | -18.746059000 | 25.925750000 |
| C | 9.698016000  | -14.611847000 | 23.066213000 | H                | 9.731204000  | -18.211272000 | 27.237126000 |
| C | 10.461063000 | -14.603582000 | 24.291832000 | H                | 9.915572000  | -17.207177000 | 25.775190000 |
| C | 9.619578000  | -14.183218000 | 25.276886000 | <sup>2</sup> TS1 |              |               |              |
| C | 8.341489000  | -13.931926000 | 24.653979000 | Fe               | 6.933150000  | -14.017151000 | 21.955128000 |
| H | 11.507896000 | -14.869727000 | 24.366437000 | N                | 5.735226000  | -13.265456000 | 23.398368000 |
| H | 9.832006000  | -14.032536000 | 26.327828000 | C                | 6.035188000  | -13.124481000 | 24.728392000 |
| C | 7.229003000  | -13.431130000 | 25.316791000 | C                | 4.887172000  | -12.623048000 | 25.444811000 |
| H | 7.320101000  | -13.255790000 | 26.384348000 | C                | 3.887767000  | -12.477496000 | 24.531618000 |
| O | 6.367877000  | -15.600434000 | 22.211151000 | C                | 4.425178000  | -12.886505000 | 23.256351000 |
| S | 7.766191000  | -11.823950000 | 21.538396000 | H                | 4.865266000  | -12.420216000 | 26.508021000 |
| H | 7.161658000  | -11.180446000 | 22.562079000 | H                | 2.874972000  | -12.129057000 | 24.689132000 |
| C | 6.729883000  | -17.525406000 | 24.925081000 | C                | 3.704748000  | -12.894046000 | 22.068183000 |
| C | 7.368589000  | -18.337744000 | 25.846308000 | H                | 2.671151000  | -12.564727000 | 22.111186000 |
| C | 8.671715000  | -19.003801000 | 25.489192000 | N                | 5.473495000  | -13.716546000 | 20.587642000 |
| C | 8.881654000  | -19.098942000 | 24.000405000 | C                | 4.200554000  | -13.282048000 | 20.830867000 |
| C | 8.183298000  | -18.262300000 | 23.146560000 | C                | 3.438584000  | -13.261768000 | 19.601958000 |
| N | 7.203221000  | -17.447817000 | 23.644052000 | C                | 4.274187000  | -13.688491000 | 18.618085000 |
| C | 8.352023000  | -18.200719000 | 21.649734000 | C                | 5.545928000  | -13.969237000 | 19.246393000 |
| C | 5.471754000  | -16.735092000 | 25.180641000 | H                | 2.403712000  | -12.953585000 | 19.524170000 |
| C | 9.863124000  | -20.069824000 | 23.470139000 | H                | 4.070903000  | -13.804784000 | 17.561144000 |
| O | 10.183636000 | -20.205206000 | 22.300570000 | C                | 6.674189000  | -14.411940000 | 18.569478000 |
| O | 10.387587000 | -20.842572000 | 24.457565000 | H                | 6.587417000  | -14.560556000 | 17.497607000 |
| C | 11.343822000 | -21.838166000 | 24.033560000 | N                | 8.208285000  | -14.543841000 | 20.481457000 |
| C | 11.794444000 | -22.594931000 | 25.269352000 | C                | 7.910089000  | -14.668636000 | 19.149860000 |
| C | 6.804467000  | -18.533929000 | 27.199102000 | C                | 9.074393000  | -15.113487000 | 18.422258000 |
| O | 5.808314000  | -17.992656000 | 27.650624000 | C                | 10.076767000 | -15.254235000 | 19.332473000 |
| O | 7.529752000  | -19.429817000 | 27.919091000 | C                | 9.523835000  | -14.899723000 | 20.617743000 |
| C | 7.041629000  | -19.706847000 | 29.249702000 | H                | 9.102993000  | -15.287309000 | 17.354140000 |
| C | 7.969425000  | -20.733755000 | 29.872280000 | H                | 11.099296000 | -15.569260000 | 19.167817000 |
| C | 9.866059000  | -18.233010000 | 26.152372000 | C                | 10.230665000 | -14.939615000 | 21.813852000 |
| H | 8.690778000  | -20.009507000 | 25.919429000 | H                | 11.275182000 | -15.231558000 | 21.765914000 |
| H | 6.791194000  | -16.509303000 | 22.919101000 | N                | 8.424442000  | -14.227928000 | 23.313794000 |
| H | 9.388678000  | -17.998320000 | 21.374454000 | C                | 9.713886000  | -14.618851000 | 23.062038000 |
| H | 8.100780000  | -19.167877000 | 21.202940000 | C                | 10.483005000 | -14.606219000 | 24.283907000 |
| H | 7.702978000  | -17.429117000 | 21.233111000 | C                | 9.645047000  | -14.184991000 | 25.271262000 |
| H | 5.214431000  | -16.147252000 | 24.298316000 | C                | 8.363922000  | -13.938683000 | 24.652495000 |
| H | 4.645207000  | -17.411737000 | 25.420233000 | H                | 11.530973000 | -14.868994000 | 24.354060000 |
| H | 5.585289000  | -16.076677000 | 26.043660000 | H                | 9.861542000  | -14.029917000 | 26.320697000 |
| H | 10.865986000 | -22.495391000 | 23.299875000 | C                | 7.255073000  | -13.434053000 | 25.318780000 |
| H | 12.177053000 | -21.336403000 | 23.530772000 | H                | 7.352377000  | -13.254288000 | 26.385077000 |
| H | 12.519852000 | -23.365833000 | 24.987358000 | O                | 6.373615000  | -15.606698000 | 22.196765000 |
| H | 12.270380000 | -21.922469000 | 25.990545000 | S                | 7.730844000  | -11.811364000 | 21.513225000 |
| H | 10.946593000 | -23.083309000 | 25.760585000 | H                | 6.977050000  | -11.143520000 | 22.414859000 |
| H | 6.012011000  | -20.071972000 | 29.178151000 | C                | 6.722319000  | -17.529174000 | 24.918893000 |
| H | 7.019115000  | -18.772331000 | 29.819780000 | C                | 7.359990000  | -18.339225000 | 25.843064000 |
| H | 7.629740000  | -20.973610000 | 30.885760000 | C                | 8.664255000  | -19.005481000 | 25.489138000 |
| H | 8.993605000  | -20.351639000 | 29.934353000 | C                | 8.876824000  | -19.103173000 | 24.000568000 |
| H | 7.981009000  | -21.658005000 | 29.285508000 | C                | 8.179368000  | -18.268148000 | 23.144168000 |

|                 |              |               |              |   |              |               |              |
|-----------------|--------------|---------------|--------------|---|--------------|---------------|--------------|
| N               | 7.197854000  | -17.454422000 | 23.638993000 | C | 4.200810000  | -13.396610000 | 18.498411000 |
| C               | 8.350313000  | -18.207783000 | 21.647450000 | C | 5.467837000  | -13.720331000 | 19.111455000 |
| C               | 5.462992000  | -16.739118000 | 25.169397000 | H | 2.344120000  | -12.660138000 | 19.432297000 |
| C               | 9.858620000  | -20.074776000 | 23.473204000 | H | 3.994144000  | -13.473330000 | 17.438529000 |
| O               | 10.178763000 | -20.213942000 | 22.303858000 | C | 6.588146000  | -14.144766000 | 18.413301000 |
| O               | 10.384021000 | -20.844133000 | 24.462932000 | H | 6.497904000  | -14.254068000 | 17.337348000 |
| C               | 11.340147000 | -21.840857000 | 24.041584000 | N | 8.122170000  | -14.361081000 | 20.320732000 |
| C               | 11.791696000 | -22.593527000 | 25.279546000 | C | 7.818278000  | -14.436183000 | 18.985030000 |
| C               | 6.793087000  | -18.533327000 | 27.194635000 | C | 8.969878000  | -14.890402000 | 18.245401000 |
| O               | 5.793397000  | -17.994680000 | 27.641781000 | C | 9.965511000  | -15.096663000 | 19.150650000 |
| O               | 7.519862000  | -19.424168000 | 27.919524000 | C | 9.425156000  | -14.771463000 | 20.447556000 |
| C               | 7.028980000  | -19.699098000 | 29.249485000 | H | 8.992629000  | -15.032791000 | 17.172502000 |
| C               | 7.958779000  | -20.720747000 | 29.877725000 | H | 10.975704000 | -15.444452000 | 18.976175000 |
| C               | 9.857016000  | -18.232409000 | 26.152288000 | C | 10.125075000 | -14.892375000 | 21.639696000 |
| H               | 8.683297000  | -20.010315000 | 25.921395000 | H | 11.158354000 | -15.219548000 | 21.583533000 |
| H               | 6.789101000  | -16.522294000 | 22.915115000 | N | 8.327905000  | -14.195670000 | 23.162629000 |
| H               | 9.388566000  | -18.012191000 | 21.373263000 | C | 9.606976000  | -14.616504000 | 22.896746000 |
| H               | 8.093551000  | -19.173540000 | 21.200618000 | C | 10.365334000 | -14.688220000 | 24.121257000 |
| H               | 7.706001000  | -17.432462000 | 21.230194000 | C | 9.536792000  | -14.281486000 | 25.123506000 |
| H               | 5.212836000  | -16.146629000 | 24.288014000 | C | 8.269961000  | -13.960177000 | 24.513721000 |
| H               | 4.634012000  | -17.416603000 | 25.398381000 | H | 11.402668000 | -14.991906000 | 24.183596000 |
| H               | 5.569895000  | -16.085902000 | 26.037101000 | H | 9.752562000  | -14.181307000 | 26.179764000 |
| H               | 10.862047000 | -22.500604000 | 23.310323000 | C | 7.180468000  | -13.443581000 | 25.200283000 |
| H               | 12.173007000 | -21.340631000 | 23.536637000 | H | 7.278071000  | -13.316253000 | 26.273753000 |
| H               | 12.516952000 | -23.365327000 | 24.999615000 | O | 6.230299000  | -15.494947000 | 21.983781000 |
| H               | 12.268075000 | -21.918659000 | 25.998197000 | S | 7.695277000  | -11.699864000 | 21.459515000 |
| H               | 10.944203000 | -23.080308000 | 25.772982000 | H | 6.953135000  | -11.055430000 | 22.387077000 |
| H               | 6.000904000  | -20.068211000 | 29.176162000 | C | 6.808881000  | -17.683591000 | 25.011900000 |
| H               | 7.001430000  | -18.763029000 | 29.816803000 | C | 7.429270000  | -18.490882000 | 25.961074000 |
| H               | 7.617196000  | -20.958800000 | 30.890995000 | C | 8.724765000  | -19.171169000 | 25.624127000 |
| H               | 8.981389000  | -20.334714000 | 29.941432000 | C | 8.970168000  | -19.256029000 | 24.145191000 |
| H               | 7.975360000  | -21.646706000 | 29.293773000 | C | 8.274397000  | -18.413548000 | 23.283067000 |
| H               | 10.795964000 | -18.745483000 | 25.928216000 | N | 7.289913000  | -17.593150000 | 23.741995000 |
| H               | 9.720413000  | -18.208075000 | 27.236761000 | C | 8.505369000  | -18.333756000 | 21.793843000 |
| H               | 9.906904000  | -17.207421000 | 25.772842000 | C | 5.563600000  | -16.869597000 | 25.264856000 |
| <sup>4</sup> IM |              |               |              | C | 9.997843000  | -20.194157000 | 23.639692000 |
| Fe              | 6.863468000  | -13.847308000 | 21.807765000 | O | 10.388375000 | -20.281258000 | 22.487563000 |
| N               | 5.677936000  | -13.141519000 | 23.279581000 | O | 10.473372000 | -20.998727000 | 24.627194000 |
| C               | 5.977157000  | -13.070721000 | 24.617539000 | C | 11.466113000 | -21.966822000 | 24.223604000 |
| C               | 4.837435000  | -12.577208000 | 25.350236000 | C | 11.852230000 | -22.766425000 | 25.454286000 |
| C               | 3.843679000  | -12.371464000 | 24.442368000 | C | 6.870497000  | -18.644495000 | 27.323402000 |
| C               | 4.372786000  | -12.736035000 | 23.151484000 | O | 5.902412000  | -18.055945000 | 27.775104000 |
| H               | 4.815289000  | -12.425502000 | 26.421924000 | O | 7.562751000  | -19.561982000 | 28.049569000 |
| H               | 2.836044000  | -12.014740000 | 24.613802000 | C | 7.073793000  | -19.801555000 | 29.387252000 |
| C               | 3.646789000  | -12.694243000 | 21.969517000 | C | 7.967773000  | -20.852485000 | 30.019174000 |
| H               | 2.620000000  | -12.347102000 | 22.024912000 | C | 9.912677000  | -18.400000000 | 26.307164000 |
| N               | 5.397316000  | -13.518735000 | 20.463466000 | H | 8.735232000  | -20.176267000 | 26.056936000 |
| C               | 4.133445000  | -13.062518000 | 20.724215000 | H | 6.714144000  | -16.078353000 | 22.619393000 |
| C               | 3.373499000  | -12.988811000 | 19.498061000 | H | 9.535171000  | -18.047957000 | 21.563928000 |

|                 |              |               |              |   |              |               |              |
|-----------------|--------------|---------------|--------------|---|--------------|---------------|--------------|
| H               | 8.349025000  | -19.308665000 | 21.322171000 | C | 10.363653000 | -14.690318000 | 24.122724000 |
| H               | 7.816960000  | -17.604725000 | 21.363651000 | C | 9.534825000  | -14.283516000 | 25.124725000 |
| H               | 5.293938000  | -16.334393000 | 24.353117000 | C | 8.268387000  | -13.961579000 | 24.514464000 |
| H               | 4.733519000  | -17.514065000 | 25.570369000 | H | 11.400848000 | -14.994402000 | 24.185433000 |
| H               | 5.709937000  | -16.157629000 | 26.081088000 | H | 9.750176000  | -14.183690000 | 26.181101000 |
| H               | 11.041283000 | -22.600157000 | 23.438140000 | C | 7.178761000  | -13.444738000 | 25.200652000 |
| H               | 12.321180000 | -21.437047000 | 23.791127000 | H | 7.275865000  | -13.317845000 | 26.274219000 |
| H               | 12.603836000 | -23.517229000 | 25.187070000 | O | 6.229768000  | -15.494656000 | 21.983679000 |
| H               | 12.274725000 | -22.117553000 | 26.228465000 | S | 7.696850000  | -11.699933000 | 21.461176000 |
| H               | 10.983302000 | -23.283569000 | 25.874006000 | H | 6.955300000  | -11.055659000 | 22.389319000 |
| H               | 6.031202000  | -20.130232000 | 29.327224000 | C | 6.807235000  | -17.685655000 | 25.011445000 |
| H               | 7.088733000  | -18.858669000 | 29.943596000 | C | 7.429009000  | -18.491523000 | 25.960966000 |
| H               | 7.625452000  | -21.066335000 | 31.037575000 | C | 8.724570000  | -19.171464000 | 25.623623000 |
| H               | 9.005325000  | -20.506520000 | 30.070864000 | C | 8.969351000  | -19.256950000 | 24.144629000 |
| H               | 7.943058000  | -21.784378000 | 29.445057000 | C | 8.272181000  | -18.415836000 | 23.282251000 |
| H               | 10.852938000 | -18.916427000 | 26.098786000 | N | 7.286709000  | -17.596534000 | 23.740898000 |
| H               | 9.759045000  | -18.372536000 | 27.388837000 | C | 8.502432000  | -18.336693000 | 21.792874000 |
| H               | 9.969240000  | -17.376675000 | 25.923491000 | C | 5.561743000  | -16.872060000 | 25.264675000 |
| <sup>2</sup> IM |              |               |              | C | 9.997459000  | -20.194648000 | 23.639187000 |
| Fe              | 6.863194000  | -13.846938000 | 21.807744000 | O | 10.387719000 | -20.281915000 | 22.486981000 |
| N               | 5.677353000  | -13.141060000 | 23.279277000 | O | 10.473715000 | -20.998605000 | 24.626836000 |
| C               | 5.975946000  | -13.071053000 | 24.617432000 | C | 11.466903000 | -21.966275000 | 24.223317000 |
| C               | 4.836116000  | -12.577258000 | 25.349780000 | C | 11.853572000 | -22.765442000 | 25.454108000 |
| C               | 3.842925000  | -12.370577000 | 24.441512000 | C | 6.871275000  | -18.644365000 | 27.323814000 |
| C               | 4.372497000  | -12.734854000 | 23.150734000 | O | 5.903329000  | -18.055799000 | 27.775787000 |
| H               | 4.813517000  | -12.426034000 | 26.421526000 | O | 7.564321000  | -19.561137000 | 28.050127000 |
| H               | 2.835390000  | -12.013407000 | 24.612597000 | C | 7.076395000  | -19.799900000 | 29.388336000 |
| C               | 3.647119000  | -12.692266000 | 21.968414000 | C | 7.971035000  | -20.850234000 | 30.020310000 |
| H               | 2.620494000  | -12.344576000 | 22.023376000 | C | 9.912558000  | -18.399568000 | 26.305756000 |
| N               | 5.397980000  | -13.517379000 | 20.463014000 | H | 8.735654000  | -20.176366000 | 26.056912000 |
| C               | 4.134223000  | -13.060450000 | 20.723276000 | H | 6.713308000  | -16.078352000 | 22.618992000 |
| C               | 3.374954000  | -12.985890000 | 19.496779000 | H | 9.531824000  | -18.049892000 | 21.562362000 |
| C               | 4.202516000  | -13.393847000 | 18.497397000 | H | 8.346942000  | -19.312017000 | 21.321768000 |
| C               | 5.469043000  | -13.718515000 | 19.110925000 | H | 7.813032000  | -17.608609000 | 21.362649000 |
| H               | 2.345806000  | -12.656576000 | 19.430614000 | H | 5.291266000  | -16.337729000 | 24.352661000 |
| H               | 3.996326000  | -13.470078000 | 17.437387000 | H | 4.732139000  | -17.516630000 | 25.571290000 |
| C               | 6.589423000  | -14.143285000 | 18.413116000 | H | 5.708344000  | -16.159358000 | 26.080217000 |
| H               | 6.499601000  | -14.252179000 | 17.337088000 | H | 11.042301000 | -22.599975000 | 23.438026000 |
| N               | 8.122381000  | -14.360919000 | 20.321186000 | H | 12.321651000 | -21.436148000 | 23.790637000 |
| C               | 7.819138000  | -14.435508000 | 18.985331000 | H | 12.605524000 | -23.515918000 | 25.186948000 |
| C               | 8.970848000  | -14.890176000 | 18.246149000 | H | 12.275830000 | -22.116210000 | 26.228115000 |
| C               | 9.965903000  | -15.097245000 | 19.151843000 | H | 10.984953000 | -23.282945000 | 25.874026000 |
| C               | 9.425074000  | -14.772113000 | 20.448572000 | H | 6.033822000  | -20.128809000 | 29.329292000 |
| H               | 8.994053000  | -15.032288000 | 17.173222000 | H | 7.091570000  | -18.856633000 | 29.944026000 |
| H               | 10.975986000 | -15.445565000 | 18.977788000 | H | 7.629512000  | -21.063448000 | 31.039113000 |
| C               | 10.124359000 | -14.893766000 | 21.640997000 | H | 9.008564000  | -20.504049000 | 30.070991000 |
| H               | 11.157498000 | -15.221447000 | 21.585205000 | H | 7.946059000  | -21.782526000 | 29.446853000 |
| N               | 8.326845000  | -14.196729000 | 23.163351000 | H | 10.852895000 | -18.915752000 | 26.097131000 |
| C               | 9.605843000  | -14.618004000 | 22.897911000 | H | 9.759441000  | -18.371723000 | 27.387487000 |



|                  |              |               |              |                  |              |               |              |
|------------------|--------------|---------------|--------------|------------------|--------------|---------------|--------------|
| H                | 9.968527000  | -17.376393000 | 25.921612000 | C                | 5.609784000  | -16.814348000 | 25.291224000 |
| <sup>4</sup> TS2 |              |               |              | C                | 9.925621000  | -20.274039000 | 23.666430000 |
| Fe               | 6.884226000  | -13.837538000 | 21.807147000 | O                | 10.302356000 | -20.393386000 | 22.514560000 |
| N                | 5.706833000  | -13.120386000 | 23.280259000 | O                | 10.445992000 | -21.016934000 | 24.678835000 |
| C                | 6.014350000  | -13.038130000 | 24.615674000 | C                | 11.452076000 | -21.980206000 | 24.296098000 |
| C                | 4.878993000  | -12.538875000 | 25.351285000 | C                | 11.882581000 | -22.715335000 | 25.551997000 |
| C                | 3.879634000  | -12.340926000 | 24.447883000 | C                | 6.835371000  | -18.723180000 | 27.300878000 |
| C                | 4.400964000  | -12.715949000 | 23.156761000 | O                | 5.853273000  | -18.159427000 | 27.748930000 |
| H                | 4.863359000  | -12.378140000 | 26.421775000 | O                | 7.580829000  | -19.580727000 | 28.046745000 |
| H                | 2.873001000  | -11.982921000 | 24.622515000 | C                | 7.114145000  | -19.806154000 | 29.395120000 |
| C                | 3.668015000  | -12.683024000 | 21.978796000 | C                | 8.060850000  | -20.797149000 | 30.046785000 |
| H                | 2.641431000  | -12.335852000 | 22.037734000 | C                | 10.179791000 | -18.150396000 | 26.437652000 |
| N                | 5.409891000  | -13.517619000 | 20.468511000 | H                | 8.842375000  | -20.142118000 | 26.151220000 |
| C                | 4.147448000  | -13.060261000 | 20.733360000 | H                | 6.728808000  | -16.075805000 | 22.628720000 |
| C                | 3.379789000  | -12.996721000 | 19.511318000 | H                | 9.615157000  | -18.054914000 | 21.655255000 |
| C                | 4.201047000  | -13.412295000 | 18.509978000 | H                | 8.388890000  | -19.246775000 | 21.299301000 |
| C                | 5.472027000  | -13.730559000 | 19.117950000 | H                | 7.931996000  | -17.521879000 | 21.379894000 |
| H                | 2.349822000  | -12.669149000 | 19.449324000 | H                | 5.368686000  | -16.222294000 | 24.407287000 |
| H                | 3.987884000  | -13.497861000 | 17.452059000 | H                | 4.741820000  | -17.415772000 | 25.578670000 |
| C                | 6.588000000  | -14.160859000 | 18.416431000 | H                | 5.809681000  | -16.152079000 | 26.138214000 |
| H                | 6.491070000  | -14.279065000 | 17.341998000 | H                | 11.025297000 | -22.657429000 | 23.549384000 |
| N                | 8.134217000  | -14.360981000 | 20.315799000 | H                | 12.285541000 | -21.451868000 | 23.821969000 |
| C                | 7.821918000  | -14.446988000 | 18.982749000 | H                | 12.644617000 | -23.461354000 | 25.301449000 |
| C                | 8.969717000  | -14.904664000 | 18.239257000 | H                | 12.307827000 | -22.023880000 | 26.286926000 |
| C                | 9.971770000  | -15.101193000 | 19.139558000 | H                | 11.034731000 | -23.231485000 | 26.013997000 |
| C                | 9.439115000  | -14.766812000 | 20.437321000 | H                | 6.087617000  | -20.184175000 | 29.353870000 |
| H                | 8.985841000  | -15.055510000 | 17.167393000 | H                | 7.090338000  | -18.848964000 | 29.925924000 |
| H                | 10.981673000 | -15.447853000 | 18.961162000 | H                | 7.737743000  | -20.997681000 | 31.074134000 |
| C                | 10.146714000 | -14.876362000 | 21.625958000 | H                | 9.082012000  | -20.403128000 | 30.078907000 |
| H                | 11.180710000 | -15.200586000 | 21.565780000 | H                | 8.073814000  | -21.745146000 | 29.499210000 |
| N                | 8.357215000  | -14.173149000 | 23.155105000 | H                | 11.010179000 | -18.782731000 | 26.142818000 |
| C                | 9.635602000  | -14.592419000 | 22.884124000 | H                | 9.869864000  | -18.198571000 | 27.475925000 |
| C                | 10.402283000 | -14.651717000 | 24.104095000 | H                | 10.064070000 | -17.202178000 | 25.922709000 |
| C                | 9.578951000  | -14.239101000 | 25.108537000 | <sup>2</sup> TS2 |              |               |              |
| C                | 8.307267000  | -13.926517000 | 24.504311000 | Fe               | 6.884338000  | -13.837583000 | 21.807285000 |
| H                | 11.441412000 | -14.950285000 | 24.162047000 | N                | 5.706992000  | -13.120556000 | 23.280505000 |
| H                | 9.801895000  | -14.128014000 | 26.162258000 | C                | 6.014387000  | -13.038846000 | 24.615989000 |
| C                | 7.221596000  | -13.405393000 | 25.193631000 | C                | 4.879088000  | -12.539515000 | 25.351642000 |
| H                | 7.326288000  | -13.268411000 | 26.265261000 | C                | 3.879887000  | -12.340977000 | 24.448197000 |
| O                | 6.250870000  | -15.482158000 | 21.996356000 | C                | 4.401262000  | -12.715713000 | 23.157009000 |
| S                | 7.712791000  | -11.691759000 | 21.436754000 | H                | 4.863381000  | -12.379141000 | 26.422185000 |
| H                | 6.975870000  | -11.040353000 | 22.363578000 | H                | 2.873336000  | -11.982747000 | 24.622835000 |
| C                | 6.792233000  | -17.697767000 | 24.990942000 | C                | 3.668468000  | -12.682202000 | 21.978963000 |
| C                | 7.367050000  | -18.584028000 | 25.922426000 | H                | 2.641978000  | -12.334746000 | 22.037869000 |
| C                | 8.504745000  | -19.333316000 | 25.519015000 | N                | 5.410307000  | -13.516879000 | 20.468647000 |
| C                | 8.876173000  | -19.341732000 | 24.147733000 | C                | 4.147960000  | -13.059194000 | 20.733484000 |
| C                | 8.243212000  | -18.427264000 | 23.283850000 | C                | 3.380486000  | -12.994996000 | 19.511369000 |
| N                | 7.269231000  | -17.609214000 | 23.732548000 | C                | 4.201742000  | -13.410471000 | 18.509987000 |
| C                | 8.561136000  | -18.298307000 | 21.817184000 | C                | 5.472544000  | -13.729343000 | 19.117998000 |

|   |              |               |              |                                |              |               |              |
|---|--------------|---------------|--------------|--------------------------------|--------------|---------------|--------------|
| H | 2.350630000  | -12.667079000 | 19.449357000 | H                              | 5.366754000  | -16.224380000 | 24.406078000 |
| H | 3.988688000  | -13.495597000 | 17.452011000 | H                              | 4.740497000  | -17.417579000 | 25.578092000 |
| C | 6.588454000  | -14.159724000 | 18.416444000 | H                              | 5.807963000  | -16.153226000 | 26.136914000 |
| H | 6.491605000  | -14.277522000 | 17.341960000 | H                              | 11.025978000 | -22.657454000 | 23.550378000 |
| N | 8.134347000  | -14.360967000 | 20.315927000 | H                              | 12.285772000 | -21.451110000 | 23.821572000 |
| C | 7.822211000  | -14.446443000 | 18.982817000 | H                              | 12.646421000 | -23.459421000 | 25.302289000 |
| C | 8.969941000  | -14.904307000 | 18.239331000 | H                              | 12.309436000 | -22.021402000 | 26.286904000 |
| C | 9.971789000  | -15.101512000 | 19.139708000 | H                              | 11.036755000 | -23.229765000 | 26.015404000 |
| C | 9.439078000  | -14.767344000 | 20.437506000 | H                              | 6.088299000  | -20.183651000 | 29.354391000 |
| H | 8.986154000  | -15.054813000 | 17.167421000 | H                              | 7.090466000  | -18.847685000 | 29.925654000 |
| H | 10.981584000 | -15.448500000 | 18.961345000 | H                              | 7.739072000  | -20.995540000 | 31.074797000 |
| C | 10.146497000 | -14.877500000 | 21.626187000 | H                              | 9.082907000  | -20.400822000 | 30.079082000 |
| H | 11.180392000 | -15.202050000 | 21.566025000 | H                              | 8.075266000  | -21.743600000 | 29.500182000 |
| N | 8.357075000  | -14.174161000 | 23.155365000 | H                              | 11.009737000 | -18.781382000 | 26.141567000 |
| C | 9.635367000  | -14.593700000 | 22.884386000 | H                              | 9.869561000  | -18.197796000 | 27.475037000 |
| C | 10.401958000 | -14.653420000 | 24.104386000 | H                              | 10.062427000 | -17.201526000 | 25.921562000 |
| C | 9.578654000  | -14.240803000 | 25.108864000 | <b>B. Deethylation of DDEP</b> |              |               |              |
| C | 8.307084000  | -13.927814000 | 24.504618000 | <b><sup>4</sup>RC</b>          |              |               |              |
| H | 11.441011000 | -14.952245000 | 24.162350000 | Fe                             | 6.861323000  | -13.479379000 | 21.640524000 |
| H | 9.801563000  | -14.129973000 | 26.162620000 | N                              | 5.549791000  | -12.355994000 | 22.686006000 |
| C | 7.221464000  | -13.406607000 | 25.193969000 | C                              | 5.783449000  | -11.716554000 | 23.877461000 |
| H | 7.326075000  | -13.269956000 | 26.265650000 | C                              | 4.566905000  | -11.123860000 | 24.376165000 |
| O | 6.250834000  | -15.482201000 | 21.996276000 | C                              | 3.591115000  | -11.418541000 | 23.474178000 |
| S | 7.713890000  | -11.691983000 | 21.437959000 | C                              | 4.216051000  | -12.188785000 | 22.426920000 |
| H | 6.977291000  | -11.040725000 | 22.365142000 | H                              | 4.487876000  | -10.560577000 | 25.296967000 |
| C | 6.790955000  | -17.699020000 | 24.990164000 | H                              | 2.543529000  | -11.147489000 | 23.499195000 |
| C | 7.366441000  | -18.584482000 | 25.922001000 | C                              | 3.550317000  | -12.674481000 | 21.304941000 |
| C | 8.504365000  | -19.333491000 | 25.518701000 | H                              | 2.488290000  | -12.463018000 | 21.226719000 |
| C | 8.875613000  | -19.342293000 | 24.147368000 | N                              | 5.455921000  | -13.775350000 | 20.222877000 |
| C | 8.241978000  | -18.428592000 | 23.283160000 | C                              | 4.129875000  | -13.403400000 | 20.279946000 |
| N | 7.267437000  | -17.611046000 | 23.731538000 | C                              | 3.422085000  | -13.901991000 | 19.126633000 |
| C | 8.559657000  | -18.300039000 | 21.816399000 | C                              | 4.322881000  | -14.595796000 | 18.380751000 |
| C | 5.608189000  | -16.815949000 | 25.290251000 | C                              | 5.586255000  | -14.520206000 | 19.071824000 |
| C | 9.925345000  | -20.274387000 | 23.666275000 | H                              | 2.369969000  | -13.737362000 | 18.932909000 |
| O | 10.301765000 | -20.394228000 | 22.514354000 | H                              | 4.164968000  | -15.118368000 | 17.446174000 |
| O | 10.446391000 | -21.016452000 | 24.678945000 | C                              | 6.755785000  | -15.123125000 | 18.638879000 |
| C | 11.452765000 | -21.979511000 | 24.296436000 | H                              | 6.710741000  | -15.693719000 | 17.716488000 |
| C | 11.884166000 | -22.713565000 | 25.552656000 | N                              | 8.226147000  | -14.365219000 | 20.447639000 |
| C | 6.835043000  | -18.723263000 | 27.300599000 | C                              | 7.987961000  | -15.034943000 | 19.274694000 |
| O | 5.852752000  | -18.159765000 | 27.748546000 | C                              | 9.205815000  | -15.627363000 | 18.777919000 |
| O | 7.581023000  | -19.580112000 | 28.046753000 | C                              | 10.187351000 | -15.306172000 | 19.663173000 |
| C | 7.114652000  | -19.805118000 | 29.395305000 | C                              | 9.567132000  | -14.525093000 | 20.705151000 |
| C | 8.061929000  | -20.795347000 | 30.047303000 | H                              | 9.281537000  | -16.206284000 | 17.866669000 |
| C | 10.179040000 | -18.149560000 | 26.436632000 | H                              | 11.237114000 | -15.567706000 | 19.631856000 |
| H | 8.842415000  | -20.141907000 | 26.151177000 | C                              | 10.233380000 | -14.022244000 | 21.812089000 |
| H | 6.728573000  | -16.076142000 | 22.628423000 | H                              | 11.297121000 | -14.225653000 | 21.887603000 |
| H | 9.613560000  | -18.056282000 | 21.654244000 | N                              | 8.331273000  | -12.934082000 | 22.907872000 |
| H | 8.387709000  | -19.248747000 | 21.298854000 | C                              | 9.650981000  | -13.286548000 | 22.839798000 |
| H | 7.930144000  | -17.523996000 | 21.378953000 | C                              | 10.369345000 | -12.777932000 | 23.982961000 |

|   |              |               |              |                 |              |               |              |
|---|--------------|---------------|--------------|-----------------|--------------|---------------|--------------|
| C | 9.461865000  | -12.110120000 | 24.746163000 | H               | 9.475356000  | -19.045818000 | 28.724602000 |
| C | 8.194725000  | -12.213064000 | 24.064149000 | H               | 10.650197000 | -17.746663000 | 28.444713000 |
| H | 11.427238000 | -12.921538000 | 24.160749000 | H               | 8.924414000  | -17.375183000 | 28.544939000 |
| H | 9.617992000  | -11.589549000 | 25.682127000 | <sup>2</sup> RC |              |               |              |
| C | 7.012191000  | -11.642880000 | 24.519354000 | Fe              | 6.881967000  | -13.464218000 | 21.651087000 |
| H | 7.051930000  | -11.096931000 | 25.456952000 | N               | 5.582752000  | -12.336430000 | 22.702591000 |
| O | 6.510780000  | -14.842694000 | 22.471863000 | C               | 5.832082000  | -11.682427000 | 23.882881000 |
| S | 7.327285000  | -11.509358000 | 20.117180000 | C               | 4.620799000  | -11.091347000 | 24.395450000 |
| H | 6.154739000  | -10.856425000 | 20.283854000 | C               | 3.631938000  | -11.401403000 | 23.513073000 |
| C | 6.673810000  | -16.976569000 | 25.605037000 | C               | 4.243235000  | -12.180294000 | 22.464281000 |
| C | 7.003154000  | -17.962390000 | 26.493703000 | H               | 4.553920000  | -10.518087000 | 25.311033000 |
| C | 8.172948000  | -18.886628000 | 26.171895000 | H               | 2.583375000  | -11.135934000 | 23.552624000 |
| C | 8.234740000  | -19.125683000 | 24.667405000 | C               | 3.558858000  | -12.685463000 | 21.362471000 |
| C | 7.869480000  | -18.118534000 | 23.819327000 | H               | 2.493800000  | -12.483098000 | 21.303789000 |
| N | 7.259336000  | -16.994285000 | 24.350463000 | N               | 5.450387000  | -13.784533000 | 20.256485000 |
| C | 8.012963000  | -18.102289000 | 22.318785000 | C               | 4.122012000  | -13.426866000 | 20.337190000 |
| C | 5.669265000  | -15.870856000 | 25.807650000 | C               | 3.393600000  | -13.955237000 | 19.210190000 |
| C | 8.769942000  | -20.380800000 | 24.131658000 | C               | 4.284673000  | -14.655304000 | 18.458420000 |
| O | 8.915754000  | -20.675638000 | 22.952079000 | C               | 5.562370000  | -14.553232000 | 19.119295000 |
| O | 9.116352000  | -21.249962000 | 25.127756000 | H               | 2.335689000  | -13.805376000 | 19.037145000 |
| C | 9.634160000  | -22.518988000 | 24.695294000 | H               | 4.111159000  | -15.198577000 | 17.538523000 |
| C | 9.960887000  | -23.325498000 | 25.940125000 | C               | 6.728155000  | -15.153446000 | 18.672736000 |
| C | 6.239762000  | -18.105275000 | 27.738024000 | H               | 6.668938000  | -15.741615000 | 17.762258000 |
| O | 5.362703000  | -17.357148000 | 28.151771000 | N               | 8.230355000  | -14.352775000 | 20.437196000 |
| O | 6.597746000  | -19.226251000 | 28.432424000 | C               | 7.972256000  | -15.044810000 | 19.281501000 |
| C | 5.872821000  | -19.460680000 | 29.651061000 | C               | 9.184065000  | -15.637223000 | 18.769636000 |
| C | 6.380618000  | -20.765123000 | 30.240444000 | C               | 10.181481000 | -15.293739000 | 19.628361000 |
| C | 9.534787000  | -18.317642000 | 26.666679000 | C               | 9.576831000  | -14.499319000 | 20.669445000 |
| H | 8.013964000  | -19.841673000 | 26.673912000 | H               | 9.245044000  | -16.231509000 | 17.867209000 |
| H | 6.999669000  | -16.251595000 | 23.701926000 | H               | 11.232252000 | -15.548428000 | 19.579634000 |
| H | 9.025582000  | -18.375397000 | 22.015639000 | C               | 10.260734000 | -13.971802000 | 21.753948000 |
| H | 7.350437000  | -18.844937000 | 21.862391000 | H               | 11.327776000 | -14.163546000 | 21.811047000 |
| H | 7.760364000  | -17.115049000 | 21.920688000 | N               | 8.368983000  | -12.888556000 | 22.875165000 |
| H | 5.730102000  | -15.144901000 | 24.990954000 | C               | 9.691913000  | -13.226105000 | 22.781731000 |
| H | 4.652284000  | -16.276468000 | 25.839607000 | C               | 10.429133000 | -12.693619000 | 23.901319000 |
| H | 5.823852000  | -15.368855000 | 26.764046000 | C               | 9.530695000  | -12.028274000 | 24.677374000 |
| H | 8.886229000  | -23.018825000 | 24.069914000 | C               | 8.250076000  | -12.155179000 | 24.026204000 |
| H | 10.519581000 | -22.353662000 | 24.071755000 | H               | 11.492670000 | -12.821180000 | 24.056193000 |
| H | 10.357485000 | -24.307301000 | 25.657718000 | H               | 9.701607000  | -11.493840000 | 25.602873000 |
| H | 10.710966000 | -22.813069000 | 26.551623000 | C               | 7.071659000  | -11.593021000 | 24.501156000 |
| H | 9.065951000  | -23.477386000 | 26.552483000 | H               | 7.125097000  | -11.037401000 | 25.432338000 |
| H | 4.800763000  | -19.503046000 | 29.430300000 | O               | 6.542227000  | -14.832688000 | 22.474141000 |
| H | 6.030490000  | -18.616955000 | 30.332008000 | S               | 7.289612000  | -11.509113000 | 20.063199000 |
| H | 5.851010000  | -20.985803000 | 31.174188000 | H               | 6.114499000  | -10.866168000 | 20.249847000 |
| H | 7.452281000  | -20.705797000 | 30.457736000 | C               | 6.657417000  | -16.994076000 | 25.593529000 |
| H | 6.217510000  | -21.596264000 | 29.546390000 | C               | 6.977686000  | -17.982073000 | 26.482946000 |
| H | 10.317837000 | -19.012467000 | 26.335187000 | C               | 8.159875000  | -18.896337000 | 26.177311000 |
| H | 9.722876000  | -17.365609000 | 26.150956000 | C               | 8.247862000  | -19.128563000 | 24.672854000 |
| C | 9.649821000  | -18.110988000 | 28.180544000 | C               | 7.891540000  | -18.119369000 | 23.823586000 |

|                  |              |               |              |   |              |               |              |
|------------------|--------------|---------------|--------------|---|--------------|---------------|--------------|
| N                | 7.265567000  | -17.001327000 | 24.349528000 | N | 5.561994000  | -13.803137000 | 20.195478000 |
| C                | 8.060679000  | -18.094535000 | 22.325859000 | C | 4.335195000  | -13.213343000 | 20.066962000 |
| C                | 5.641624000  | -15.896418000 | 25.783594000 | C | 3.795970000  | -13.471181000 | 18.750501000 |
| C                | 8.798136000  | -20.378369000 | 24.140356000 | C | 4.718499000  | -14.220972000 | 18.090523000 |
| O                | 8.962365000  | -20.668409000 | 22.961927000 | C | 5.821962000  | -14.419507000 | 19.003253000 |
| O                | 9.135838000  | -21.249019000 | 25.138286000 | H | 2.837294000  | -13.113033000 | 18.397347000 |
| C                | 9.667012000  | -22.513422000 | 24.708805000 | H | 4.678296000  | -14.607897000 | 17.080224000 |
| C                | 9.982135000  | -23.321905000 | 25.955363000 | C | 6.982747000  | -15.113867000 | 18.689516000 |
| C                | 6.193266000  | -18.136566000 | 27.712514000 | H | 7.056833000  | -15.540801000 | 17.694217000 |
| O                | 5.301844000  | -17.398243000 | 28.113133000 | N | 8.147250000  | -14.834233000 | 20.831935000 |
| O                | 6.549205000  | -19.256650000 | 28.409715000 | C | 8.063781000  | -15.293520000 | 19.543286000 |
| C                | 5.805093000  | -19.501476000 | 29.614523000 | C | 9.271200000  | -16.001403000 | 19.192272000 |
| C                | 6.314659000  | -20.802851000 | 30.209183000 | C | 10.081776000 | -15.962833000 | 20.285782000 |
| C                | 9.508861000  | -18.319422000 | 26.696729000 | C | 9.369195000  | -15.233669000 | 21.307548000 |
| H                | 7.999422000  | -19.854646000 | 26.672580000 | H | 9.458071000  | -16.459292000 | 18.229270000 |
| H                | 7.012862000  | -16.257132000 | 23.700309000 | H | 11.072671000 | -16.381987000 | 20.406298000 |
| H                | 9.076637000  | -18.371612000 | 22.038352000 | C | 9.859716000  | -14.995424000 | 22.585696000 |
| H                | 7.401460000  | -18.830180000 | 21.853354000 | H | 10.853669000 | -15.366999000 | 22.814773000 |
| H                | 7.820150000  | -17.103300000 | 21.930075000 | N | 7.935409000  | -13.759153000 | 23.475639000 |
| H                | 5.713124000  | -15.164995000 | 24.972577000 | C | 9.190688000  | -14.301316000 | 23.584576000 |
| H                | 4.626976000  | -16.308971000 | 25.793652000 | C | 9.735631000  | -14.024053000 | 24.892943000 |
| H                | 5.774514000  | -15.399219000 | 26.745735000 | C | 8.797832000  | -13.301181000 | 25.565445000 |
| H                | 8.930525000  | -23.015849000 | 24.071989000 | C | 7.680268000  | -13.131106000 | 24.667641000 |
| H                | 10.559611000 | -22.340861000 | 24.097575000 | H | 10.717053000 | -14.334376000 | 25.228869000 |
| H                | 10.388346000 | -24.300445000 | 25.675272000 | H | 8.847289000  | -12.899244000 | 26.569526000 |
| H                | 10.720960000 | -22.806874000 | 26.578272000 | C | 6.536030000  | -12.401516000 | 24.964210000 |
| H                | 9.080146000  | -23.481026000 | 26.555423000 | H | 6.466675000  | -11.961548000 | 25.954316000 |
| H                | 4.737507000  | -19.553223000 | 29.374832000 | O | 5.951818000  | -15.241371000 | 22.393228000 |
| H                | 5.942730000  | -18.658397000 | 30.300618000 | S | 7.878890000  | -11.895056000 | 21.067991000 |
| H                | 5.771356000  | -21.030870000 | 31.133258000 | H | 7.314155000  | -10.984061000 | 21.891811000 |
| H                | 7.381905000  | -20.734307000 | 30.444741000 | C | 6.338372000  | -16.884048000 | 25.300168000 |
| H                | 6.171009000  | -21.633602000 | 29.510371000 | C | 6.945662000  | -17.706791000 | 26.233393000 |
| H                | 10.302692000 | -19.006357000 | 26.374505000 | C | 8.092757000  | -18.582257000 | 25.807873000 |
| H                | 9.697834000  | -17.363358000 | 26.188863000 | C | 8.028339000  | -18.923211000 | 24.342187000 |
| C                | 9.597972000  | -18.119574000 | 28.213268000 | C | 7.369486000  | -18.069040000 | 23.472266000 |
| H                | 9.423175000  | -19.058751000 | 28.749707000 | N | 6.641746000  | -17.025775000 | 23.973688000 |
| H                | 10.590724000 | -17.747841000 | 28.495319000 | C | 7.320662000  | -18.214184000 | 21.972935000 |
| H                | 8.860292000  | -17.392144000 | 28.569745000 | C | 5.276188000  | -15.856390000 | 25.598678000 |
| <sup>4</sup> TS1 |              |               |              | C | 8.728173000  | -20.125373000 | 23.841418000 |
| Fe               | 6.720000000  | -13.826047000 | 21.847703000 | O | 8.794844000  | -20.487180000 | 22.678070000 |
| N                | 5.399358000  | -12.632325000 | 22.799225000 | O | 9.304001000  | -20.828181000 | 24.852147000 |
| C                | 5.479550000  | -12.176616000 | 24.090228000 | C | 9.990283000  | -22.037646000 | 24.462563000 |
| C                | 4.295740000  | -11.419997000 | 24.421479000 | C | 10.557887000 | -22.666523000 | 25.721606000 |
| C                | 3.499022000  | -11.434454000 | 23.317907000 | C | 6.482242000  | -17.718419000 | 27.637415000 |
| C                | 4.194634000  | -12.200276000 | 22.311132000 | O | 5.749962000  | -16.893351000 | 28.159245000 |
| H                | 4.114454000  | -10.949569000 | 25.379581000 | O | 6.950283000  | -18.800359000 | 28.312868000 |
| H                | 2.526927000  | -10.978064000 | 23.180995000 | C | 6.533474000  | -18.905474000 | 29.691209000 |
| C                | 3.693774000  | -12.462401000 | 21.042096000 | C | 7.108014000  | -20.196029000 | 30.245695000 |
| H                | 2.720504000  | -12.049636000 | 20.795552000 | C | 9.483528000  | -17.869493000 | 26.076944000 |

|                  |              |               |              |   |              |               |              |
|------------------|--------------|---------------|--------------|---|--------------|---------------|--------------|
| H                | 8.098894000  | -19.498459000 | 26.402275000 | H | 10.006518000 | -16.588944000 | 19.163841000 |
| H                | 6.300854000  | -16.110794000 | 23.180583000 | H | 11.275916000 | -16.134699000 | 21.516870000 |
| H                | 8.324322000  | -18.255264000 | 21.543807000 | C | 9.720073000  | -14.507182000 | 23.271651000 |
| H                | 6.834246000  | -19.156512000 | 21.702351000 | H | 10.680481000 | -14.791701000 | 23.690642000 |
| H                | 6.767794000  | -17.381392000 | 21.536167000 | N | 7.684039000  | -13.199560000 | 23.661175000 |
| H                | 4.969544000  | -15.357817000 | 24.677918000 | C | 8.916978000  | -13.664301000 | 24.029967000 |
| H                | 4.406719000  | -16.331975000 | 26.063322000 | C | 9.291420000  | -13.115175000 | 25.312747000 |
| H                | 5.638007000  | -15.115789000 | 26.314589000 | C | 8.272849000  | -12.300711000 | 25.702245000 |
| H                | 9.278789000  | -22.698625000 | 23.957048000 | C | 7.271659000  | -12.362023000 | 24.662818000 |
| H                | 10.772296000 | -21.783311000 | 23.739789000 | H | 10.222786000 | -13.323362000 | 25.823933000 |
| H                | 11.087320000 | -23.591319000 | 25.467648000 | H | 8.190614000  | -11.704635000 | 26.602211000 |
| H                | 11.264070000 | -21.990216000 | 26.214245000 | C | 6.066697000  | -11.673450000 | 24.690072000 |
| H                | 9.760931000  | -22.910311000 | 26.431660000 | H | 5.864719000  | -11.051806000 | 25.556829000 |
| H                | 5.439691000  | -18.891252000 | 29.730823000 | O | 5.946017000  | -15.031770000 | 22.697418000 |
| H                | 6.893030000  | -18.026713000 | 30.236845000 | S | 7.760931000  | -11.814259000 | 20.902519000 |
| H                | 6.808939000  | -20.315081000 | 31.292804000 | H | 6.896347000  | -10.844808000 | 21.276805000 |
| H                | 8.202004000  | -20.191811000 | 30.199386000 | C | 6.777093000  | -16.702184000 | 25.497951000 |
| H                | 6.742088000  | -21.060813000 | 29.682752000 | C | 7.324986000  | -17.673532000 | 26.318586000 |
| H                | 10.256304000 | -18.537897000 | 25.682522000 | C | 8.180227000  | -18.752940000 | 25.714158000 |
| H                | 9.507519000  | -16.950302000 | 25.480067000 | C | 7.823057000  | -19.010344000 | 24.273533000 |
| C                | 9.787005000  | -17.548960000 | 27.541797000 | C | 7.245376000  | -17.999157000 | 23.524571000 |
| H                | 9.742342000  | -18.445179000 | 28.168973000 | N | 6.869890000  | -16.833590000 | 24.138116000 |
| H                | 10.796620000 | -17.129058000 | 27.624194000 | C | 6.955674000  | -18.067814000 | 22.047080000 |
| H                | 9.091653000  | -16.810396000 | 27.954158000 | C | 6.020364000  | -15.488805000 | 25.974636000 |
| <sup>2</sup> TS1 |              |               |              | C | 8.187906000  | -20.301698000 | 23.655166000 |
| Fe               | 6.672687000  | -13.669465000 | 21.968692000 | O | 8.043690000  | -20.608254000 | 22.482803000 |
| N                | 5.177419000  | -12.442488000 | 22.534098000 | O | 8.713494000  | -21.162889000 | 24.567341000 |
| C                | 5.091490000  | -11.728691000 | 23.702135000 | C | 9.079065000  | -22.464433000 | 24.060806000 |
| C                | 3.819897000  | -11.051253000 | 23.776060000 | C | 9.636198000  | -23.266750000 | 25.222134000 |
| C                | 3.134054000  | -11.379559000 | 22.646864000 | C | 7.107518000  | -17.634488000 | 27.780657000 |
| C                | 3.989188000  | -12.251236000 | 21.878154000 | O | 6.701909000  | -16.679674000 | 28.423188000 |
| H                | 3.507408000  | -10.417508000 | 24.596249000 | O | 7.392791000  | -18.829370000 | 28.361977000 |
| H                | 2.141472000  | -11.069721000 | 22.345613000 | C | 7.187132000  | -18.894535000 | 29.789562000 |
| C                | 3.643601000  | -12.800811000 | 20.650151000 | C | 7.514404000  | -20.307839000 | 30.235168000 |
| H                | 2.664373000  | -12.553520000 | 20.252113000 | C | 9.713142000  | -18.357694000 | 25.769154000 |
| N                | 5.716661000  | -14.031821000 | 20.221581000 | H | 8.078896000  | -19.672957000 | 26.293483000 |
| C                | 4.459221000  | -13.618036000 | 19.879924000 | H | 6.443985000  | -15.890420000 | 23.414296000 |
| C                | 4.106888000  | -14.123198000 | 18.571663000 | H | 7.879396000  | -18.192805000 | 21.474911000 |
| C                | 5.175961000  | -14.836089000 | 18.127774000 | H | 6.337068000  | -18.940345000 | 21.821790000 |
| C                | 6.177615000  | -14.773017000 | 19.168229000 | H | 6.445966000  | -17.160050000 | 21.722506000 |
| H                | 3.164165000  | -13.936370000 | 18.073293000 | H | 5.583039000  | -14.961818000 | 25.126041000 |
| H                | 5.296451000  | -15.360899000 | 17.188618000 | H | 5.234483000  | -15.778549000 | 26.676730000 |
| C                | 7.424345000  | -15.377943000 | 19.094733000 | H | 6.682092000  | -14.809940000 | 26.520138000 |
| H                | 7.661130000  | -15.929498000 | 18.190263000 | H | 8.191847000  | -22.934409000 | 23.624096000 |
| N                | 8.266983000  | -14.709257000 | 21.302310000 | H | 9.812122000  | -22.338647000 | 23.257288000 |
| C                | 8.389840000  | -15.344690000 | 20.093390000 | H | 9.922795000  | -24.266597000 | 24.878295000 |
| C                | 9.662438000  | -16.018780000 | 20.017313000 | H | 10.521994000 | -22.781913000 | 25.645519000 |
| C                | 10.298821000 | -15.792392000 | 21.200438000 | H | 8.890382000  | -23.376449000 | 26.016165000 |
| C                | 9.420156000  | -14.970013000 | 21.995482000 | H | 6.149163000  | -18.624408000 | 30.008609000 |

|                 |              |               |              |                 |              |               |              |
|-----------------|--------------|---------------|--------------|-----------------|--------------|---------------|--------------|
| H               | 7.828522000  | -18.150648000 | 30.273756000 | S               | 7.849575000  | -11.753284000 | 20.912362000 |
| H               | 7.365374000  | -20.399230000 | 31.316617000 | H               | 7.158339000  | -10.897878000 | 21.697999000 |
| H               | 8.555591000  | -20.560926000 | 30.009532000 | C               | 6.323614000  | -17.077857000 | 25.260814000 |
| H               | 6.866619000  | -21.035570000 | 29.735757000 | C               | 6.819976000  | -17.851640000 | 26.306288000 |
| H               | 10.258758000 | -19.154711000 | 25.252911000 | C               | 8.059962000  | -18.665251000 | 26.088576000 |
| H               | 9.843928000  | -17.440963000 | 25.181180000 | C               | 8.286434000  | -18.983061000 | 24.638029000 |
| C               | 10.295502000 | -18.170076000 | 27.171853000 | C               | 7.709325000  | -18.171245000 | 23.666182000 |
| H               | 10.153311000 | -19.064010000 | 27.787820000 | N               | 6.838786000  | -17.180172000 | 24.005744000 |
| H               | 11.372332000 | -17.975802000 | 27.101303000 | C               | 7.949438000  | -18.308318000 | 22.182744000 |
| H               | 9.843887000  | -17.321874000 | 27.697100000 | C               | 5.172404000  | -16.109552000 | 25.388086000 |
| <sup>4</sup> IM |              |               |              | C               | 9.187523000  | -20.099030000 | 24.274499000 |
| Fe              | 6.795684000  | -13.724356000 | 21.560073000 | O               | 9.531614000  | -20.407912000 | 23.145801000 |
| N               | 5.641666000  | -12.682247000 | 22.844525000 | O               | 9.597826000  | -20.792244000 | 25.370348000 |
| C               | 5.905719000  | -12.423978000 | 24.166817000 | C               | 10.459404000 | -21.921665000 | 25.111471000 |
| C               | 4.799546000  | -11.713155000 | 24.758882000 | C               | 10.786347000 | -22.562710000 | 26.447620000 |
| C               | 3.859087000  | -11.565383000 | 23.785411000 | C               | 6.162647000  | -17.854548000 | 27.633595000 |
| C               | 4.387909000  | -12.182701000 | 22.594339000 | O               | 5.397108000  | -17.005225000 | 28.057269000 |
| H               | 4.760389000  | -11.388321000 | 25.790855000 | O               | 6.490367000  | -18.960433000 | 28.351148000 |
| H               | 2.887240000  | -11.093031000 | 23.851709000 | C               | 5.876798000  | -19.066713000 | 29.654271000 |
| C               | 3.704271000  | -12.267757000 | 21.389670000 | C               | 6.332396000  | -20.377657000 | 30.268142000 |
| H               | 2.715651000  | -11.822500000 | 21.342780000 | C               | 9.339330000  | -17.876650000 | 26.609078000 |
| N               | 5.408534000  | -13.485862000 | 20.116069000 | H               | 8.013664000  | -19.585930000 | 26.675227000 |
| C               | 4.188382000  | -12.879021000 | 20.242817000 | H               | 6.424318000  | -15.779830000 | 22.690234000 |
| C               | 3.475624000  | -12.938485000 | 18.987856000 | H               | 9.010359000  | -18.212166000 | 21.937256000 |
| C               | 4.288118000  | -13.579167000 | 18.104988000 | H               | 7.646260000  | -19.299280000 | 21.831007000 |
| C               | 5.498985000  | -13.912231000 | 18.818384000 | H               | 7.377766000  | -17.543722000 | 21.654386000 |
| H               | 2.485587000  | -12.532347000 | 18.823886000 | H               | 4.915957000  | -15.723954000 | 24.400040000 |
| H               | 4.106102000  | -13.809995000 | 17.063084000 | H               | 4.297796000  | -16.592432000 | 25.833503000 |
| C               | 6.592973000  | -14.545232000 | 18.248160000 | H               | 5.429083000  | -15.275802000 | 26.047874000 |
| H               | 6.524052000  | -14.820698000 | 17.200713000 | H               | 9.941192000  | -22.613090000 | 24.439200000 |
| N               | 8.041453000  | -14.587645000 | 20.232696000 | H               | 11.357171000 | -21.570563000 | 24.592177000 |
| C               | 7.771530000  | -14.850954000 | 18.913639000 | H               | 11.437384000 | -23.430070000 | 26.293085000 |
| C               | 8.894002000  | -15.524590000 | 18.309002000 | H               | 11.304137000 | -21.857371000 | 27.105890000 |
| C               | 9.836573000  | -15.672935000 | 19.280086000 | H               | 9.875851000  | -22.901345000 | 26.952588000 |
| C               | 9.292349000  | -15.092643000 | 20.482889000 | H               | 4.789367000  | -19.024012000 | 29.535844000 |
| H               | 8.934696000  | -15.841319000 | 17.274635000 | H               | 6.175477000  | -18.202873000 | 30.257399000 |
| H               | 10.811960000 | -16.137194000 | 19.209274000 | H               | 5.882345000  | -20.499179000 | 31.259495000 |
| C               | 9.938845000  | -15.086790000 | 21.710895000 | H               | 7.421380000  | -20.402556000 | 30.379989000 |
| H               | 10.934811000 | -15.515748000 | 21.754690000 | H               | 6.030039000  | -21.226553000 | 29.646411000 |
| N               | 8.175408000  | -13.986099000 | 23.019471000 | H               | 10.206652000 | -18.495832000 | 26.359159000 |
| C               | 9.412566000  | -14.564910000 | 22.883572000 | H               | 9.417941000  | -16.950107000 | 26.028406000 |
| C               | 10.121462000 | -14.508933000 | 24.138100000 | C               | 9.357783000  | -17.563299000 | 28.106698000 |
| C               | 9.308442000  | -13.866798000 | 25.023137000 | H               | 9.249988000  | -18.470453000 | 28.710278000 |
| C               | 8.100355000  | -13.529325000 | 24.311442000 | H               | 10.313424000 | -17.094643000 | 28.370269000 |
| H               | 11.120383000 | -14.895465000 | 24.296207000 | H               | 8.562937000  | -16.867377000 | 28.394958000 |
| H               | 9.500339000  | -13.617917000 | 26.059214000 | <sup>2</sup> IM |              |               |              |
| C               | 7.047422000  | -12.808160000 | 24.856238000 | Fe              | 6.795238000  | -13.725761000 | 21.557922000 |
| H               | 7.124577000  | -12.517494000 | 25.899129000 | N               | 5.641980000  | -12.682120000 | 22.841774000 |
| O               | 6.001102000  | -15.256872000 | 21.964397000 | C               | 5.906196000  | -12.423450000 | 24.163996000 |

|   |              |               |              |                  |              |               |              |
|---|--------------|---------------|--------------|------------------|--------------|---------------|--------------|
| C | 4.800653000  | -11.711284000 | 24.755611000 | C                | 10.787564000 | -22.560397000 | 26.451696000 |
| C | 3.860447000  | -11.563019000 | 23.781975000 | C                | 6.163847000  | -17.851471000 | 27.635436000 |
| C | 4.388779000  | -12.181435000 | 22.591270000 | O                | 5.398734000  | -17.001568000 | 28.058705000 |
| H | 4.761719000  | -11.385942000 | 25.787432000 | O                | 6.492129000  | -18.956481000 | 28.354105000 |
| H | 2.889059000  | -11.089678000 | 23.847943000 | C                | 5.879746000  | -19.060978000 | 29.657948000 |
| C | 3.705265000  | -12.266410000 | 21.386524000 | C                | 6.336427000  | -20.370781000 | 30.273439000 |
| H | 2.717088000  | -11.820213000 | 21.339202000 | C                | 9.339534000  | -17.874761000 | 26.608629000 |
| N | 5.408728000  | -13.486720000 | 20.113838000 | H                | 8.014036000  | -19.584006000 | 26.677639000 |
| C | 4.189093000  | -12.878590000 | 20.240077000 | H                | 6.423096000  | -15.780646000 | 22.689337000 |
| C | 3.476663000  | -12.937651000 | 18.984950000 | H                | 9.005369000  | -18.215585000 | 21.936585000 |
| C | 4.288802000  | -13.579236000 | 18.102417000 | H                | 7.643295000  | -19.305578000 | 21.833810000 |
| C | 5.499130000  | -13.913352000 | 18.816170000 | H                | 7.371174000  | -17.550786000 | 21.654524000 |
| H | 2.487056000  | -12.530603000 | 18.820634000 | H                | 4.914058000  | -15.725154000 | 24.400259000 |
| H | 4.106868000  | -13.810068000 | 17.060500000 | H                | 4.296204000  | -16.593057000 | 25.834148000 |
| C | 6.592594000  | -14.547485000 | 18.246276000 | H                | 5.427434000  | -15.276291000 | 26.047934000 |
| H | 6.523642000  | -14.823054000 | 17.198857000 | H                | 9.942361000  | -22.612750000 | 24.443340000 |
| N | 8.040367000  | -14.590898000 | 20.231185000 | H                | 11.357683000 | -21.569210000 | 24.595521000 |
| C | 7.770643000  | -14.854317000 | 18.912150000 | H                | 11.439160000 | -23.427448000 | 26.297778000 |
| C | 8.892486000  | -15.529519000 | 18.308121000 | H                | 11.304911000 | -21.854242000 | 27.109439000 |
| C | 9.834485000  | -15.678779000 | 19.279615000 | H                | 9.877298000  | -22.899254000 | 26.956930000 |
| C | 9.290561000  | -15.097402000 | 20.482028000 | H                | 4.792194000  | -19.018943000 | 29.540379000 |
| H | 8.933153000  | -15.846631000 | 17.273870000 | H                | 6.178565000  | -18.196062000 | 30.259446000 |
| H | 10.809308000 | -16.144299000 | 19.209324000 | H                | 5.887277000  | -20.490976000 | 31.265363000 |
| C | 9.936770000  | -15.091864000 | 21.710169000 | H                | 7.425516000  | -20.395047000 | 30.384387000 |
| H | 10.932216000 | -15.522000000 | 21.754307000 | H                | 6.033895000  | -21.220758000 | 29.653272000 |
| N | 8.174481000  | -13.988570000 | 23.017988000 | H                | 10.206684000 | -18.494287000 | 26.358978000 |
| C | 9.410995000  | -14.568735000 | 22.882534000 | H                | 9.417846000  | -16.948934000 | 26.026786000 |
| C | 10.119879000 | -14.512655000 | 24.137072000 | C                | 9.358912000  | -17.559554000 | 28.105851000 |
| C | 9.307460000  | -13.869063000 | 25.021620000 | H                | 9.251353000  | -18.465939000 | 28.710626000 |
| C | 8.099759000  | -13.530873000 | 24.309600000 | H                | 10.314779000 | -17.090704000 | 28.368251000 |
| H | 11.118391000 | -14.900110000 | 24.295491000 | H                | 8.564337000  | -16.863161000 | 28.393722000 |
| H | 9.499518000  | -13.619678000 | 26.057545000 | <sup>4</sup> TS2 |              |               |              |
| C | 7.047410000  | -12.808365000 | 24.853785000 | Fe               | 6.819349000  | -13.722932000 | 21.561770000 |
| H | 7.124669000  | -12.517163000 | 25.896521000 | N                | 5.667958000  | -12.684976000 | 22.852458000 |
| O | 5.999932000  | -15.257788000 | 21.963628000 | C                | 5.941827000  | -12.418431000 | 24.171082000 |
| S | 7.852070000  | -11.756193000 | 20.910558000 | C                | 4.835959000  | -11.712400000 | 24.769421000 |
| H | 7.162027000  | -10.899915000 | 21.696265000 | C                | 3.885790000  | -11.576336000 | 23.803677000 |
| C | 6.321950000  | -17.078572000 | 25.261255000 | C                | 4.408833000  | -12.194941000 | 22.610669000 |
| C | 6.819937000  | -17.850324000 | 26.307532000 | H                | 4.803329000  | -11.383037000 | 25.800187000 |
| C | 8.059868000  | -18.664004000 | 26.089855000 | H                | 2.911138000  | -11.110745000 | 23.876385000 |
| C | 8.285357000  | -18.983630000 | 24.639543000 | C                | 3.717088000  | -12.286786000 | 21.411054000 |
| C | 7.706319000  | -18.174072000 | 23.666959000 | H                | 2.724487000  | -11.849763000 | 21.371124000 |
| N | 6.834957000  | -17.183408000 | 24.005592000 | N                | 5.423532000  | -13.487811000 | 20.124509000 |
| C | 7.944918000  | -18.313416000 | 22.183479000 | C                | 4.198912000  | -12.892383000 | 20.260205000 |
| C | 5.170746000  | -16.110239000 | 25.388441000 | C                | 3.479090000  | -12.954993000 | 19.009274000 |
| C | 9.187008000  | -20.099381000 | 24.276832000 | C                | 4.292123000  | -13.585771000 | 18.119879000 |
| O | 9.531175000  | -20.409008000 | 23.148362000 | C                | 5.509963000  | -13.910375000 | 18.825545000 |
| O | 9.597877000  | -20.791465000 | 25.373215000 | H                | 2.484495000  | -12.557309000 | 18.852279000 |
| C | 10.460166000 | -21.920527000 | 25.115097000 | H                | 4.106040000  | -13.815496000 | 17.078446000 |

|   |              |               |              |                  |              |               |              |
|---|--------------|---------------|--------------|------------------|--------------|---------------|--------------|
| C | 6.605376000  | -14.534344000 | 18.247999000 | H                | 5.543655000  | -15.288800000 | 26.159419000 |
| H | 6.533153000  | -14.806873000 | 17.200001000 | H                | 9.956422000  | -22.631305000 | 24.479055000 |
| N | 8.062854000  | -14.576801000 | 20.226015000 | H                | 11.347375000 | -21.551139000 | 24.595786000 |
| C | 7.788640000  | -14.835859000 | 18.907034000 | H                | 11.496288000 | -23.380806000 | 26.324383000 |
| C | 8.912279000  | -15.500693000 | 18.294631000 | H                | 11.336723000 | -21.799070000 | 27.113787000 |
| C | 9.859822000  | -15.647975000 | 19.260952000 | H                | 9.931796000  | -22.879171000 | 26.997606000 |
| C | 9.317655000  | -15.075586000 | 20.468531000 | H                | 4.910540000  | -19.028094000 | 29.642722000 |
| H | 8.950231000  | -15.812766000 | 17.258744000 | H                | 6.286596000  | -18.118041000 | 30.270069000 |
| H | 10.837445000 | -16.106508000 | 19.183910000 | H                | 6.128081000  | -20.371000000 | 31.391055000 |
| C | 9.969310000  | -15.070560000 | 21.693717000 | H                | 7.626986000  | -20.258786000 | 30.446770000 |
| H | 10.967442000 | -15.495052000 | 21.731896000 | H                | 6.243338000  | -21.171297000 | 29.810177000 |
| N | 8.209041000  | -13.976573000 | 23.012281000 | H                | 10.311138000 | -18.531791000 | 26.501125000 |
| C | 9.446493000  | -14.552541000 | 22.869782000 | H                | 9.589341000  | -16.931614000 | 25.978638000 |
| C | 10.163031000 | -14.492674000 | 24.119873000 | C                | 9.451426000  | -17.330370000 | 28.154594000 |
| C | 9.354511000  | -13.848976000 | 25.008134000 | H                | 9.294030000  | -18.196267000 | 28.806032000 |
| C | 8.141377000  | -13.515711000 | 24.303136000 | H                | 10.359882000 | -16.816388000 | 28.510971000 |
| H | 11.164625000 | -14.874844000 | 24.272043000 | H                | 8.617847000  | -16.633505000 | 28.294855000 |
| H | 9.553247000  | -13.595096000 | 26.041760000 | <sup>2</sup> TS2 |              |               |              |
| C | 7.090978000  | -12.794300000 | 24.852532000 | Fe               | 6.819393000  | -13.722890000 | 21.561967000 |
| H | 7.175333000  | -12.498596000 | 25.893465000 | N                | 5.667945000  | -12.684717000 | 22.852425000 |
| O | 6.031260000  | -15.257393000 | 21.965076000 | C                | 5.941274000  | -12.418843000 | 24.171310000 |
| S | 7.858578000  | -11.744277000 | 20.908216000 | C                | 4.835482000  | -11.712428000 | 24.769343000 |
| H | 7.152967000  | -10.890649000 | 21.682936000 | C                | 3.885910000  | -11.575435000 | 23.803148000 |
| C | 6.321007000  | -17.084932000 | 25.247611000 | C                | 4.409236000  | -12.193885000 | 22.610182000 |
| C | 6.764594000  | -17.934336000 | 26.278747000 | H                | 4.802495000  | -11.383454000 | 25.800222000 |
| C | 7.834218000  | -18.829821000 | 25.995599000 | H                | 2.911485000  | -11.109318000 | 23.875517000 |
| C | 8.206069000  | -19.042299000 | 24.635832000 | C                | 3.718050000  | -12.284977000 | 21.410186000 |
| C | 7.689517000  | -18.167195000 | 23.663075000 | H                | 2.725732000  | -11.847348000 | 21.369854000 |
| N | 6.821911000  | -17.188522000 | 23.999097000 | N                | 5.424422000  | -13.486794000 | 20.124235000 |
| C | 8.019090000  | -18.253211000 | 22.195473000 | C                | 4.200089000  | -12.890610000 | 20.259460000 |
| C | 5.248149000  | -16.041782000 | 25.423396000 | C                | 3.480834000  | -12.952509000 | 19.008179000 |
| C | 9.138811000  | -20.138979000 | 24.282690000 | C                | 4.293889000  | -13.583610000 | 18.119036000 |
| O | 9.492794000  | -20.446214000 | 23.158403000 | C                | 5.511196000  | -13.909113000 | 18.825189000 |
| O | 9.579182000  | -20.804231000 | 25.385363000 | H                | 2.486561000  | -12.554171000 | 18.850798000 |
| C | 10.465670000 | -21.915810000 | 25.132644000 | H                | 4.108154000  | -13.812996000 | 17.077466000 |
| C | 10.826559000 | -22.526927000 | 26.474121000 | C                | 6.606486000  | -14.533582000 | 18.247975000 |
| C | 6.159160000  | -17.902075000 | 27.632168000 | H                | 6.534550000  | -14.805865000 | 17.199893000 |
| O | 5.379737000  | -17.063248000 | 28.049015000 | N                | 8.063068000  | -14.577125000 | 20.226587000 |
| O | 6.561884000  | -18.955795000 | 28.390615000 | C                | 7.789305000  | -14.835855000 | 18.907464000 |
| C | 6.002358000  | -19.021213000 | 29.719885000 | C                | 8.912848000  | -15.501214000 | 18.295451000 |
| C | 6.534253000  | -20.281350000 | 30.377601000 | C                | 9.859884000  | -15.649149000 | 19.262166000 |
| C | 9.614651000  | -17.726741000 | 26.720532000 | C                | 9.317496000  | -15.076642000 | 20.469591000 |
| H | 8.058829000  | -19.604346000 | 26.715552000 | H                | 8.951079000  | -15.813160000 | 17.259536000 |
| H | 6.436853000  | -15.789140000 | 22.697011000 | H                | 10.837289000 | -16.108206000 | 19.185489000 |
| H | 9.095650000  | -18.174817000 | 22.020046000 | C                | 9.968638000  | -15.072143000 | 21.695041000 |
| H | 7.719406000  | -19.224642000 | 21.790093000 | H                | 10.966553000 | -15.497115000 | 21.733553000 |
| H | 7.497897000  | -17.457694000 | 21.661142000 | N                | 8.208314000  | -13.977687000 | 23.013138000 |
| H | 5.051272000  | -15.561463000 | 24.463933000 | C                | 9.445593000  | -14.554088000 | 22.871000000 |
| H | 4.326266000  | -16.490533000 | 25.806218000 | C                | 10.161678000 | -14.494732000 | 24.121369000 |



|   |              |               |              |                 |              |               |              |
|---|--------------|---------------|--------------|-----------------|--------------|---------------|--------------|
| C | 9.353013000  | -13.850982000 | 25.009479000 | H               | 9.294747000  | -18.194870000 | 28.804876000 |
| C | 8.140274000  | -13.517154000 | 24.304079000 | H               | 10.359807000 | -16.814627000 | 28.508737000 |
| H | 11.163091000 | -14.877257000 | 24.273839000 | H               | 8.617573000  | -16.632597000 | 28.293490000 |
| H | 9.551429000  | -13.597413000 | 26.043243000 | <sup>4</sup> PC |              |               |              |
| C | 7.089884000  | -12.795508000 | 24.853212000 | Fe              | 6.821896000  | -13.875913000 | 21.532650000 |
| H | 7.173848000  | -12.500197000 | 25.894288000 | N               | 5.768333000  | -12.667434000 | 22.755123000 |
| O | 6.030793000  | -15.257191000 | 21.965054000 | C               | 5.985146000  | -12.457914000 | 24.094623000 |
| S | 7.860350000  | -11.744692000 | 20.909747000 | C               | 4.966491000  | -11.587153000 | 24.626712000 |
| H | 7.155508000  | -10.890978000 | 21.685072000 | C               | 4.124334000  | -11.290747000 | 23.598752000 |
| C | 6.319066000  | -17.086400000 | 25.247248000 | C               | 4.625951000  | -11.977755000 | 22.434384000 |
| C | 6.763793000  | -17.934970000 | 26.278591000 | H               | 4.913110000  | -11.263946000 | 25.658551000 |
| C | 7.833663000  | -18.830097000 | 25.995249000 | H               | 3.235414000  | -10.672961000 | 23.610944000 |
| C | 8.204973000  | -19.042937000 | 24.635390000 | C               | 4.015573000  | -11.949076000 | 21.188677000 |
| C | 7.687250000  | -18.168685000 | 23.662476000 | H               | 3.114034000  | -11.353564000 | 21.086597000 |
| N | 6.818989000  | -17.190571000 | 23.998399000 | N               | 5.581671000  | -13.419867000 | 20.008476000 |
| C | 8.016076000  | -18.255181000 | 22.194730000 | C               | 4.468278000  | -12.626527000 | 20.066556000 |
| C | 5.245810000  | -16.043669000 | 25.423137000 | C               | 3.832687000  | -12.572813000 | 18.770534000 |
| C | 9.138085000  | -20.139301000 | 24.282232000 | C               | 4.584286000  | -13.336565000 | 17.932890000 |
| O | 9.491525000  | -20.446920000 | 23.157879000 | C               | 5.680945000  | -13.857616000 | 18.714982000 |
| O | 9.579528000  | -20.803742000 | 25.384967000 | H               | 2.931878000  | -12.013929000 | 18.551004000 |
| C | 10.466521000 | -21.914918000 | 25.132250000 | H               | 4.431361000  | -13.536858000 | 16.880061000 |
| C | 10.828993000 | -22.524852000 | 26.473839000 | C               | 6.692875000  | -14.657335000 | 18.206406000 |
| C | 6.159059000  | -17.902403000 | 27.632321000 | H               | 6.645216000  | -14.919625000 | 17.154394000 |
| O | 5.379464000  | -17.063754000 | 28.049205000 | N               | 7.996026000  | -14.921320000 | 20.273483000 |
| O | 6.562693000  | -18.955580000 | 28.391035000 | C               | 7.768151000  | -15.141258000 | 18.938156000 |
| C | 6.003964000  | -19.020608000 | 29.720659000 | C               | 8.810375000  | -15.975651000 | 18.394721000 |
| C | 6.536821000  | -20.280177000 | 30.378686000 | C               | 9.662487000  | -16.261957000 | 19.417730000 |
| C | 9.614016000  | -17.725949000 | 26.719025000 | C               | 9.141413000  | -15.606781000 | 20.591728000 |
| H | 8.059022000  | -19.604211000 | 26.715417000 | H               | 8.864266000  | -16.295329000 | 17.361890000 |
| H | 6.435949000  | -15.789323000 | 22.696846000 | H               | 10.560796000 | -16.865829000 | 19.399079000 |
| H | 9.092497000  | -18.176261000 | 22.018689000 | C               | 9.706881000  | -15.699503000 | 21.855942000 |
| H | 7.716708000  | -19.226950000 | 21.789922000 | H               | 10.622719000 | -16.273622000 | 21.953951000 |
| H | 7.494153000  | -17.460161000 | 21.660361000 | N               | 8.056533000  | -14.343025000 | 23.067797000 |
| H | 5.048149000  | -15.563987000 | 24.463512000 | C               | 9.196791000  | -15.104811000 | 23.000491000 |
| H | 4.324364000  | -16.492622000 | 25.806776000 | C               | 9.825324000  | -15.163783000 | 24.296890000 |
| H | 5.541429000  | -15.290133000 | 26.158549000 | C               | 9.068721000  | -14.406634000 | 25.138927000 |
| H | 9.957163000  | -22.631211000 | 24.479618000 | C               | 7.974151000  | -13.883133000 | 24.358373000 |
| H | 11.347509000 | -21.550050000 | 24.594354000 | H               | 10.736591000 | -15.707124000 | 24.512591000 |
| H | 11.499143000 | -23.378403000 | 26.324115000 | H               | 9.226424000  | -14.203450000 | 26.190875000 |
| H | 11.339250000 | -21.796209000 | 27.112534000 | C               | 7.011745000  | -13.011109000 | 24.846924000 |
| H | 9.934925000  | -22.877307000 | 26.998369000 | H               | 7.067611000  | -12.739027000 | 25.896134000 |
| H | 4.912106000  | -19.028028000 | 29.644129000 | O               | 5.771662000  | -15.265330000 | 21.874530000 |
| H | 6.288105000  | -18.117036000 | 30.270236000 | S               | 8.209042000  | -12.091636000 | 20.965614000 |
| H | 6.131278000  | -20.369513000 | 31.392419000 | H               | 7.665404000  | -11.159168000 | 21.779281000 |
| H | 7.629583000  | -20.257074000 | 30.447209000 | C               | 6.210079000  | -17.506444000 | 24.923773000 |
| H | 6.245988000  | -21.170538000 | 29.811870000 | C               | 6.759252000  | -18.479650000 | 25.792209000 |
| H | 10.310753000 | -18.530760000 | 26.499530000 | C               | 7.459711000  | -19.542829000 | 25.220475000 |
| H | 9.587816000  | -16.931132000 | 25.976842000 | C               | 7.610373000  | -19.644580000 | 23.836792000 |
| C | 9.451388000  | -17.329140000 | 28.153033000 | C               | 7.054098000  | -18.620701000 | 23.032761000 |

|                 |              |               |              |   |              |               |              |
|-----------------|--------------|---------------|--------------|---|--------------|---------------|--------------|
| N               | 6.394899000  | -17.593073000 | 23.595539000 | N | 5.363465000  | -13.393095000 | 20.150955000 |
| C               | 7.129168000  | -18.596366000 | 21.529923000 | C | 4.140432000  | -12.836818000 | 20.412506000 |
| C               | 5.385471000  | -16.335753000 | 25.386755000 | C | 3.355096000  | -12.781370000 | 19.201606000 |
| C               | 8.347644000  | -20.799052000 | 23.246183000 | C | 4.126511000  | -13.301549000 | 18.209437000 |
| O               | 8.564766000  | -20.967418000 | 22.061309000 | C | 5.384291000  | -13.676774000 | 18.812155000 |
| O               | 8.765947000  | -21.668949000 | 24.195480000 | H | 2.348921000  | -12.386722000 | 19.139536000 |
| C               | 9.493226000  | -22.822085000 | 23.715988000 | H | 3.887269000  | -13.424442000 | 17.160810000 |
| C               | 9.872051000  | -23.656652000 | 24.925291000 | C | 6.452739000  | -14.222172000 | 18.116585000 |
| C               | 6.624820000  | -18.378935000 | 27.273890000 | H | 6.326271000  | -14.388582000 | 17.051650000 |
| O               | 6.028247000  | -17.498450000 | 27.867543000 | N | 8.016722000  | -14.439157000 | 19.999493000 |
| O               | 7.262603000  | -19.386458000 | 27.908876000 | C | 7.672438000  | -14.571352000 | 18.678195000 |
| C               | 7.236634000  | -19.342990000 | 29.354908000 | C | 8.765932000  | -15.158053000 | 17.943568000 |
| C               | 7.916083000  | -20.602354000 | 29.859277000 | C | 9.766033000  | -15.387337000 | 18.838303000 |
| C               | 8.867934000  | -15.541000000 | 29.148705000 | C | 9.286753000  | -14.943020000 | 20.123730000 |
| H               | 7.888493000  | -20.302568000 | 25.859456000 | H | 8.749354000  | -15.366410000 | 16.881388000 |
| H               | 6.126074000  | -15.937567000 | 22.505574000 | H | 10.741519000 | -15.823224000 | 18.664071000 |
| H               | 8.166589000  | -18.573612000 | 21.184566000 | C | 10.007085000 | -15.043979000 | 21.305640000 |
| H               | 6.690680000  | -19.504253000 | 21.104038000 | H | 11.011396000 | -15.451301000 | 21.247258000 |
| H               | 6.599149000  | -17.718401000 | 21.157536000 | N | 8.307793000  | -14.121849000 | 22.821894000 |
| H               | 5.037421000  | -15.775283000 | 24.517703000 | C | 9.545663000  | -14.651860000 | 22.553729000 |
| H               | 4.530286000  | -16.672072000 | 25.980453000 | C | 10.332653000 | -14.698731000 | 23.761325000 |
| H               | 5.966051000  | -15.676367000 | 26.037919000 | C | 9.566279000  | -14.165559000 | 24.753068000 |
| H               | 8.856226000  | -23.373860000 | 23.017351000 | C | 8.308041000  | -13.792887000 | 24.154654000 |
| H               | 10.371594000 | -22.478435000 | 23.160348000 | H | 11.345997000 | -15.075326000 | 23.819656000 |
| H               | 10.425969000 | -24.545117000 | 24.603146000 | H | 9.821085000  | -14.010705000 | 25.793897000 |
| H               | 10.505776000 | -23.086465000 | 25.612304000 | C | 7.280115000  | -13.151874000 | 24.830650000 |
| H               | 8.980703000  | -23.985463000 | 25.469351000 | H | 7.419155000  | -12.958789000 | 25.889646000 |
| H               | 6.196471000  | -19.272824000 | 29.686950000 | O | 6.091211000  | -15.333060000 | 21.762277000 |
| H               | 7.755747000  | -18.435939000 | 29.682325000 | S | 7.813246000  | -11.694812000 | 20.981754000 |
| H               | 7.923790000  | -20.604603000 | 30.954691000 | H | 7.124097000  | -10.935128000 | 21.861786000 |
| H               | 8.951751000  | -20.656845000 | 29.508407000 | C | 6.104335000  | -17.260363000 | 24.993532000 |
| H               | 7.386967000  | -21.497682000 | 29.516986000 | C | 6.471264000  | -18.098091000 | 26.073892000 |
| H               | 9.848546000  | -15.358774000 | 29.578593000 | C | 7.495797000  | -19.022711000 | 25.864946000 |
| H               | 8.829900000  | -15.967664000 | 28.151199000 | C | 8.126606000  | -19.129414000 | 24.624356000 |
| C               | 7.631605000  | -15.025225000 | 29.801120000 | C | 7.710227000  | -18.254778000 | 23.592993000 |
| H               | 7.698652000  | -15.071713000 | 30.895792000 | N | 6.742613000  | -17.348253000 | 23.813694000 |
| H               | 7.443131000  | -13.965041000 | 29.550904000 | C | 8.280801000  | -18.265193000 | 22.200321000 |
| H               | 6.750642000  | -15.590386000 | 29.478927000 | C | 4.997051000  | -16.243166000 | 25.057135000 |
| <sup>2</sup> PC |              |               |              | C | 9.205563000  | -20.137009000 | 24.414451000 |
| Fe              | 6.838264000  | -13.748449000 | 21.480340000 | O | 9.770019000  | -20.359186000 | 23.360295000 |
| N               | 5.745721000  | -12.871363000 | 22.931699000 | O | 9.505946000  | -20.802839000 | 25.555787000 |
| C               | 6.089453000  | -12.731863000 | 24.253509000 | C | 10.522474000 | -21.824223000 | 25.438378000 |
| C               | 5.009450000  | -12.110148000 | 24.978709000 | C | 10.695539000 | -22.454943000 | 26.807473000 |
| C               | 4.004832000  | -11.896517000 | 24.084399000 | C | 5.797414000  | -18.010599000 | 27.401162000 |
| C               | 4.468353000  | -12.382510000 | 22.808744000 | O | 4.861936000  | -17.282743000 | 27.673260000 |
| H               | 5.030473000  | -11.884452000 | 26.037329000 | O | 6.352820000  | -18.851560000 | 28.308088000 |
| H               | 3.030001000  | -11.458294000 | 24.256547000 | C | 5.741600000  | -18.854130000 | 29.618491000 |
| C               | 3.713854000  | -12.363205000 | 21.644212000 | C | 6.487167000  | -19.866274000 | 30.468066000 |
| H               | 2.715007000  | -11.942642000 | 21.702156000 | C | 10.416288000 | -17.474135000 | 27.280713000 |

|                             |              |               |              |   |              |               |              |
|-----------------------------|--------------|---------------|--------------|---|--------------|---------------|--------------|
| H                           | 7.798279000  | -19.673812000 | 26.673189000 | C | 0.858837000  | 0.009813000   | -2.998347000 |
| H                           | 6.478543000  | -15.880669000 | 22.487873000 | H | -1.657197000 | 0.725469000   | -5.028577000 |
| H                           | 9.355727000  | -18.061671000 | 22.209904000 | H | 0.994025000  | 0.195640000   | -5.228855000 |
| H                           | 8.165323000  | -19.250934000 | 21.739937000 | C | 2.168595000  | -0.311110000  | -2.676938000 |
| H                           | 7.770797000  | -17.513057000 | 21.596804000 | H | 2.878422000  | -0.384746000  | -3.494982000 |
| H                           | 4.892673000  | -15.763002000 | 24.083250000 | N | 1.901003000  | -0.505160000  | -0.249076000 |
| H                           | 4.052308000  | -16.715694000 | 25.341977000 | C | 2.648140000  | -0.555266000  | -1.393633000 |
| H                           | 5.195527000  | -15.485556000 | 25.821153000 | C | 4.019544000  | -0.882726000  | -1.088194000 |
| H                           | 10.202751000 | -22.552841000 | 24.686611000 | C | 4.091731000  | -1.030698000  | 0.263031000  |
| H                           | 11.446336000 | -21.361392000 | 25.077476000 | C | 2.764624000  | -0.791314000  | 0.775126000  |
| H                           | 11.459572000 | -23.238493000 | 26.759775000 | H | 4.808360000  | -0.981770000  | -1.822391000 |
| H                           | 11.012039000 | -21.710855000 | 27.545693000 | H | 4.952335000  | -1.277890000  | 0.870806000  |
| H                           | 9.759888000  | -22.907184000 | 27.151991000 | C | 2.425693000  | -0.834456000  | 2.121929000  |
| H                           | 4.682181000  | -19.107392000 | 29.510658000 | H | 3.215737000  | -1.077154000  | 2.825885000  |
| H                           | 5.798720000  | -17.843680000 | 30.035293000 | O | -0.443254000 | -1.792201000  | -0.242832000 |
| H                           | 6.049290000  | -19.900519000 | 31.471633000 | S | 0.213987000  | 2.315394000   | -0.027619000 |
| H                           | 7.544136000  | -19.596962000 | 30.563202000 | H | -0.226133000 | 2.514869000   | 1.235372000  |
| H                           | 6.423666000  | -20.867911000 | 30.030673000 | C | 1.594046000  | -4.997683000  | 0.208698000  |
| H                           | 10.714693000 | -18.469359000 | 26.965878000 | C | 2.462440000  | -6.017426000  | -0.069989000 |
| H                           | 10.269192000 | -16.729777000 | 26.504265000 | C | 3.086916000  | -6.072920000  | -1.460434000 |
| C                           | 9.950549000  | -17.232357000 | 28.675598000 | C | 2.020608000  | -5.681837000  | -2.478964000 |
| H                           | 8.912083000  | -17.578896000 | 28.825197000 | C | 1.158909000  | -4.669238000  | -2.157573000 |
| H                           | 10.564440000 | -17.770843000 | 29.409797000 | N | 1.131152000  | -4.227235000  | -0.845059000 |
| H                           | 9.969977000  | -16.167357000 | 28.935688000 | C | 0.153161000  | -4.006627000  | -3.064063000 |
| C. Deisopropylation of DDIP |              |               |              | C | 1.001013000  | -4.646430000  | 1.549094000  |
| <sup>4</sup> RC             |              |               |              | C | 1.915999000  | -6.347939000  | -3.781557000 |
| Fe                          | -0.086638000 | -0.202846000  | -0.108776000 | O | 1.174251000  | -6.038258000  | -4.705449000 |
| N                           | 0.049250000  | -0.273467000  | 1.904309000  | O | 2.758584000  | -7.418379000  | -3.878385000 |
| C                           | 1.159902000  | -0.599659000  | 2.641782000  | C | 2.698229000  | -8.149285000  | -5.114609000 |
| C                           | 0.830000000  | -0.665024000  | 4.044119000  | C | 3.671679000  | -9.309866000  | -5.004733000 |
| C                           | -0.497085000 | -0.380147000  | 4.146371000  | C | 2.782993000  | -7.009555000  | 0.961480000  |
| C                           | -0.972141000 | -0.138908000  | 2.806051000  | O | 2.419672000  | -6.994566000  | 2.130957000  |
| H                           | 1.533180000  | -0.900769000  | 4.832389000  | O | 3.557533000  | -8.023247000  | 0.473940000  |
| H                           | -1.111022000 | -0.331665000  | 5.036442000  | C | 3.893978000  | -9.057344000  | 1.413876000  |
| C                           | -2.282926000 | 0.203830000   | 2.486703000  | C | 4.721298000  | -10.093883000 | 0.673741000  |
| H                           | -2.991058000 | 0.278520000   | 3.306289000  | C | 4.347191000  | -5.142862000  | -1.561482000 |
| N                           | -2.006511000 | 0.396775000   | 0.057407000  | H | 3.413014000  | -7.093221000  | -1.662101000 |
| C                           | -2.757791000 | 0.461214000   | 1.211607000  | H | 0.523694000  | -3.438066000  | -0.624054000 |
| C                           | -4.121040000 | 0.812768000   | 0.900093000  | H | 0.604135000  | -3.719550000  | -4.015280000 |
| C                           | -4.196519000 | 0.940063000   | -0.451747000 | H | -0.657145000 | -4.701623000  | -3.309865000 |
| C                           | -2.879222000 | 0.671000000   | -0.972535000 | H | -0.277481000 | -3.126342000  | -2.576947000 |
| H                           | -4.906806000 | 0.935705000   | 1.634312000  | H | 0.498612000  | -3.675487000  | 1.500401000  |
| H                           | -5.057024000 | 1.190581000   | -1.058582000 | H | 0.268530000  | -5.402133000  | 1.854275000  |
| C                           | -2.550587000 | 0.674547000   | -2.317930000 | H | 1.763695000  | -4.632183000  | 2.328852000  |
| H                           | -3.344643000 | 0.895231000   | -3.024458000 | H | 1.671225000  | -8.492225000  | -5.280461000 |
| N                           | -0.168184000 | 0.144226000   | -2.094604000 | H | 2.954099000  | -7.479048000  | -5.942650000 |
| C                           | -1.282128000 | 0.443353000   | -2.835859000 | H | 3.656126000  | -9.901374000  | -5.927151000 |
| C                           | -0.951363000 | 0.503162000   | -4.238805000 | H | 4.693254000  | -8.949912000  | -4.843203000 |
| C                           | 0.379077000  | 0.238648000   | -4.339304000 | H | 3.403662000  | -9.965058000  | -4.169347000 |

|                 |              |               |              |   |              |               |              |
|-----------------|--------------|---------------|--------------|---|--------------|---------------|--------------|
| H               | 2.972455000  | -9.486340000  | 1.822142000  | H | 4.972565000  | -1.280967000  | 0.844797000  |
| H               | 4.445839000  | -8.617245000  | 2.251761000  | C | 2.452463000  | -0.844388000  | 2.109067000  |
| H               | 4.995176000  | -10.909496000 | 1.352509000  | H | 3.246054000  | -1.088128000  | 2.808614000  |
| H               | 5.641457000  | -9.650918000  | 0.278279000  | O | -0.463677000 | -1.794393000  | -0.243492000 |
| H               | 4.157164000  | -10.516321000 | -0.164257000 | S | 0.212887000  | 2.321652000   | -0.046338000 |
| H               | 4.005563000  | -4.118650000  | -1.349916000 | H | -0.237256000 | 2.526309000   | 1.212327000  |
| C               | 5.419721000  | -5.501343000  | -0.521283000 | C | 1.564805000  | -5.000039000  | 0.205810000  |
| H               | 5.789087000  | -6.523232000  | -0.670240000 | C | 2.437712000  | -6.016762000  | -0.069932000 |
| H               | 6.276143000  | -4.820231000  | -0.604798000 | C | 3.073960000  | -6.064979000  | -1.455416000 |
| H               | 5.038070000  | -5.429723000  | 0.502304000  | C | 2.014906000  | -5.672471000  | -2.481049000 |
| C               | 4.963964000  | -5.150732000  | -2.968777000 | C | 1.148025000  | -4.663343000  | -2.162616000 |
| H               | 5.306035000  | -6.155530000  | -3.244400000 | N | 1.108632000  | -4.226593000  | -0.848675000 |
| H               | 4.251020000  | -4.820031000  | -3.731019000 | C | 0.147222000  | -4.000291000  | -3.074214000 |
| H               | 5.830801000  | -4.478816000  | -3.011243000 | C | 0.959942000  | -4.655476000  | 1.542679000  |
| <sup>2</sup> RC |              |               |              | C | 1.923033000  | -6.333259000  | -3.787276000 |
| Fe              | -0.068576000 | -0.216036000  | -0.108097000 | O | 1.187557000  | -6.022309000  | -4.715769000 |
| N               | 0.078023000  | -0.274639000  | 1.902351000  | O | 2.770688000  | -7.399892000  | -3.882215000 |
| C               | 1.190758000  | -0.602737000  | 2.635509000  | C | 2.724220000  | -8.124491000  | -5.122720000 |
| C               | 0.868661000  | -0.659037000  | 4.039850000  | C | 3.703480000  | -9.280048000  | -5.011387000 |
| C               | -0.456253000 | -0.366334000  | 4.148013000  | C | 2.751228000  | -7.012810000  | 0.959837000  |
| C               | -0.938239000 | -0.130736000  | 2.809243000  | O | 2.377278000  | -7.004075000  | 2.126023000  |
| H               | 1.575135000  | -0.894020000  | 4.825387000  | O | 3.532554000  | -8.022559000  | 0.474747000  |
| H               | -1.064843000 | -0.309792000  | 5.041278000  | C | 3.862239000  | -9.060412000  | 1.412877000  |
| C               | -2.251043000 | 0.210428000   | 2.497125000  | C | 4.701599000  | -10.090028000 | 0.676647000  |
| H               | -2.953296000 | 0.288495000   | 3.321456000  | C | 4.332325000  | -5.131230000  | -1.542251000 |
| N               | -1.991097000 | 0.392496000   | 0.066255000  | H | 3.404318000  | -7.083619000  | -1.658563000 |
| C               | -2.736420000 | 0.456800000   | 1.223671000  | H | 0.498545000  | -3.438752000  | -0.629673000 |
| C               | -4.104543000 | 0.794750000   | 0.917906000  | H | 0.603931000  | -3.709858000  | -4.021634000 |
| C               | -4.188846000 | 0.910894000   | -0.434471000 | H | -0.660043000 | -4.696295000  | -3.327159000 |
| C               | -2.872003000 | 0.649379000   | -0.960695000 | H | -0.288567000 | -3.122236000  | -2.587631000 |
| H               | -4.887218000 | 0.916218000   | 1.655664000  | H | 0.455507000  | -3.685594000  | 1.493531000  |
| H               | -5.055029000 | 1.149189000   | -1.038161000 | H | 0.227001000  | -5.414244000  | 1.838998000  |
| C               | -2.550297000 | 0.646897000   | -2.307939000 | H | 1.716215000  | -4.642121000  | 2.328695000  |
| H               | -3.349504000 | 0.858005000   | -3.011591000 | H | 1.700556000  | -8.472462000  | -5.298501000 |
| N               | -0.163272000 | 0.129268000   | -2.096077000 | H | 2.982678000  | -7.448364000  | -5.945143000 |
| C               | -1.283871000 | 0.418719000   | -2.831649000 | H | 3.698559000  | -9.866686000  | -5.937031000 |
| C               | -0.962143000 | 0.471955000   | -4.237114000 | H | 4.721666000  | -8.915094000  | -4.839959000 |
| C               | 0.368755000  | 0.212753000   | -4.344802000 | H | 3.432766000  | -9.941236000  | -4.181621000 |
| C               | 0.857663000  | -0.006924000  | -3.005591000 | H | 2.937751000  | -9.494941000  | 1.808451000  |
| H               | -1.674003000 | 0.686608000   | -5.023598000 | H | 4.402983000  | -8.622849000  | 2.259282000  |
| H               | 0.978126000  | 0.167022000   | -5.238041000 | H | 4.970531000  | -10.908412000 | 1.354060000  |
| C               | 2.169970000  | -0.322981000  | -2.689492000 | H | 5.624672000  | -9.641703000  | 0.294234000  |
| H               | 2.876458000  | -0.397029000  | -3.510367000 | H | 4.148643000  | -10.509840000 | -0.170083000 |
| N               | 1.913010000  | -0.516594000  | -0.259211000 | H | 3.986316000  | -4.108860000  | -1.329274000 |
| C               | 2.655406000  | -0.563362000  | -1.408009000 | C | 5.397390000  | -5.491171000  | -0.494855000 |
| C               | 4.028989000  | -0.886243000  | -1.109132000 | H | 5.771232000  | -6.511191000  | -0.645505000 |
| C               | 4.108127000  | -1.036180000  | 0.241518000  | H | 6.252350000  | -4.807022000  | -0.568096000 |
| C               | 2.783350000  | -0.801358000  | 0.760533000  | H | 5.007126000  | -5.425582000  | 0.525893000  |
| H               | 4.814667000  | -0.981463000  | -1.847185000 | C | 4.960712000  | -5.131218000  | -2.944456000 |

|                  |              |              |              |                  |              |              |              |
|------------------|--------------|--------------|--------------|------------------|--------------|--------------|--------------|
| H                | 5.308430000  | -6.133700000 | -3.221461000 | N                | 1.309370000  | -3.294951000 | -1.516610000 |
| H                | 4.252845000  | -4.799755000 | -3.711086000 | C                | -0.648468000 | -3.281671000 | -2.956406000 |
| H                | 5.825584000  | -4.456203000 | -2.977027000 | C                | 2.640421000  | -3.568907000 | 0.498000000  |
| <sup>4</sup> TS1 |              |              |              | C                | 0.912682000  | -5.164143000 | -4.725388000 |
| Fe               | 0.006122000  | -0.009425000 | -0.036472000 | O                | -0.174393000 | -4.890265000 | -5.207814000 |
| N                | 0.034442000  | -0.048594000 | 1.981849000  | O                | 1.705003000  | -6.142506000 | -5.237055000 |
| C                | 1.139706000  | -0.102226000 | 2.791465000  | C                | 1.177716000  | -6.834595000 | -6.389190000 |
| C                | 0.736624000  | -0.213137000 | 4.172746000  | C                | 2.205804000  | -7.867462000 | -6.812375000 |
| C                | -0.624208000 | -0.240595000 | 4.183042000  | C                | 4.337490000  | -5.449082000 | -1.141310000 |
| C                | -1.053916000 | -0.141178000 | 2.808639000  | O                | 4.795279000  | -5.293408000 | -0.020778000 |
| H                | 1.420088000  | -0.267467000 | 5.010592000  | O                | 4.798110000  | -6.410027000 | -1.984264000 |
| H                | -1.291792000 | -0.320876000 | 5.031497000  | C                | 5.866801000  | -7.233270000 | -1.469950000 |
| C                | -2.382858000 | -0.142524000 | 2.403954000  | C                | 6.225048000  | -8.241132000 | -2.546475000 |
| H                | -3.138789000 | -0.217934000 | 3.179446000  | C                | 3.840028000  | -3.583222000 | -3.955332000 |
| N                | -2.019577000 | 0.061735000  | -0.010546000 | H                | 3.327772000  | -5.681798000 | -3.635609000 |
| C                | -2.822542000 | -0.037868000 | 1.092108000  | H                | 0.661385000  | -2.450920000 | -0.827937000 |
| C                | -4.213773000 | 0.006161000  | 0.699975000  | H                | -0.711505000 | -2.669821000 | -3.860583000 |
| C                | -4.234425000 | 0.141265000  | -0.652421000 | H                | -1.290099000 | -4.149780000 | -3.130410000 |
| C                | -2.855989000 | 0.174739000  | -1.087203000 | H                | -1.022460000 | -2.711852000 | -2.105098000 |
| H                | -5.048494000 | -0.052811000 | 1.386824000  | H                | 1.814902000  | -2.970168000 | 0.884768000  |
| H                | -5.089582000 | 0.215658000  | -1.312089000 | H                | 2.719564000  | -4.499666000 | 1.066252000  |
| C                | -2.452238000 | 0.312036000  | -2.407605000 | H                | 3.581567000  | -3.034448000 | 0.653866000  |
| H                | -3.227008000 | 0.400768000  | -3.162683000 | H                | 0.221819000  | -7.293946000 | -6.117025000 |
| N                | -0.025488000 | 0.241931000  | -2.036713000 | H                | 0.976904000  | -6.104405000 | -7.179948000 |
| C                | -1.132010000 | 0.345571000  | -2.839608000 | H                | 1.838254000  | -8.420920000 | -7.683388000 |
| C                | -0.730741000 | 0.474013000  | -4.219068000 | H                | 3.153433000  | -7.390471000 | -7.083453000 |
| C                | 0.630920000  | 0.439471000  | -4.237597000 | H                | 2.398031000  | -8.582589000 | -6.005969000 |
| C                | 1.062543000  | 0.296178000  | -2.868635000 | H                | 5.526245000  | -7.718289000 | -0.549445000 |
| H                | -1.415001000 | 0.576486000  | -5.051679000 | H                | 6.713920000  | -6.590782000 | -1.208023000 |
| H                | 1.296219000  | 0.510755000  | -5.088709000 | H                | 7.030809000  | -8.892914000 | -2.191441000 |
| C                | 2.391936000  | 0.228010000  | -2.469265000 | H                | 6.566072000  | -7.738685000 | -3.457662000 |
| H                | 3.148141000  | 0.291833000  | -3.245781000 | H                | 5.362717000  | -8.866323000 | -2.799801000 |
| N                | 2.028837000  | 0.043185000  | -0.051436000 | H                | 3.479616000  | -2.634109000 | -3.536388000 |
| C                | 2.833072000  | 0.123957000  | -1.155476000 | C                | 5.340756000  | -3.701660000 | -3.655153000 |
| C                | 4.221930000  | 0.115392000  | -0.759661000 | H                | 5.740937000  | -4.664181000 | -3.993261000 |
| C                | 4.241346000  | 0.042337000  | 0.599759000  | H                | 5.884441000  | -2.909180000 | -4.183317000 |
| C                | 2.864508000  | -0.000495000 | 1.032958000  | H                | 5.563061000  | -3.594938000 | -2.589130000 |
| H                | 5.058208000  | 0.173509000  | -1.444776000 | C                | 3.610543000  | -3.557182000 | -5.472990000 |
| H                | 5.096616000  | 0.024023000  | 1.263295000  | H                | 3.897000000  | -4.508222000 | -5.935780000 |
| C                | 2.459605000  | -0.069811000 | 2.359508000  | H                | 2.568673000  | -3.350248000 | -5.735519000 |
| H                | 3.234922000  | -0.107340000 | 3.118423000  | H                | 4.223901000  | -2.767631000 | -5.923620000 |
| O                | -0.020777000 | -1.712513000 | -0.137838000 | <sup>2</sup> TS1 |              |              |              |
| S                | -0.014633000 | 2.374024000  | 0.052814000  | Fe               | 0.008114000  | -0.015978000 | -0.026390000 |
| H                | 0.377278000  | 2.520029000  | 1.337925000  | N                | 0.028164000  | -0.031306000 | 1.989555000  |
| C                | 2.427185000  | -3.862638000 | -0.965140000 | C                | 1.130030000  | -0.077426000 | 2.804940000  |
| C                | 3.231060000  | -4.677141000 | -1.745511000 | C                | 0.721717000  | -0.177411000 | 4.185040000  |
| C                | 2.982794000  | -4.730371000 | -3.229799000 | C                | -0.639218000 | -0.206436000 | 4.190284000  |
| C                | 1.521885000  | -4.533428000 | -3.535555000 | C                | -1.063257000 | -0.118749000 | 2.813864000  |
| C                | 0.771235000  | -3.720245000 | -2.701935000 | H                | 1.401934000  | -0.224250000 | 5.025924000  |

|   |              |              |              |                 |              |              |              |
|---|--------------|--------------|--------------|-----------------|--------------|--------------|--------------|
| H | -1.310032000 | -0.280727000 | 5.036704000  | C               | 5.877408000  | -7.223939000 | -1.486448000 |
| C | -2.390361000 | -0.124236000 | 2.403545000  | C               | 6.244643000  | -8.222661000 | -2.568563000 |
| H | -3.149615000 | -0.194564000 | 3.176285000  | C               | 3.827820000  | -3.580142000 | -3.964693000 |
| N | -2.014839000 | 0.066535000  | -0.008969000 | H               | 3.328199000  | -5.680502000 | -3.644449000 |
| C | -2.824330000 | -0.027535000 | 1.088773000  | H               | 0.636174000  | -2.497149000 | -0.812053000 |
| C | -4.213267000 | 0.020916000  | 0.690014000  | H               | -0.734573000 | -2.703453000 | -3.854125000 |
| C | -4.226156000 | 0.155746000  | -0.662645000 | H               | -1.297981000 | -4.182130000 | -3.110350000 |
| C | -2.845418000 | 0.183562000  | -1.089618000 | H               | -1.033388000 | -2.735725000 | -2.096518000 |
| H | -5.051755000 | -0.033933000 | 1.372560000  | H               | 1.827107000  | -2.965369000 | 0.879664000  |
| H | -5.077410000 | 0.233617000  | -1.326892000 | H               | 2.713837000  | -4.505202000 | 1.062506000  |
| C | -2.434723000 | 0.319988000  | -2.408199000 | H               | 3.592664000  | -3.051298000 | 0.647229000  |
| H | -3.206102000 | 0.412380000  | -3.166353000 | H               | 0.222985000  | -7.310886000 | -6.113038000 |
| N | -0.010881000 | 0.233652000  | -2.028216000 | H               | 0.960618000  | -6.113467000 | -7.179210000 |
| C | -1.112919000 | 0.343298000  | -2.836099000 | H               | 1.838747000  | -8.421759000 | -7.691452000 |
| C | -0.705692000 | 0.457735000  | -4.214966000 | H               | 3.148818000  | -7.380466000 | -7.098922000 |
| C | 0.655463000  | 0.405561000  | -4.228301000 | H               | 2.411207000  | -8.580385000 | -6.017942000 |
| C | 1.080023000  | 0.267605000  | -2.856630000 | H               | 5.535704000  | -7.717250000 | -0.570728000 |
| H | -1.385676000 | 0.562121000  | -5.050782000 | H               | 6.720875000  | -6.579927000 | -1.216464000 |
| H | 1.324646000  | 0.461980000  | -5.077425000 | H               | 7.051683000  | -8.873631000 | -2.214870000 |
| C | 2.407296000  | 0.189395000  | -2.450679000 | H               | 6.587252000  | -7.712210000 | -3.474701000 |
| H | 3.166966000  | 0.236410000  | -3.225009000 | H               | 5.386005000  | -8.849573000 | -2.830105000 |
| N | 2.033270000  | 0.040062000  | -0.033132000 | H               | 3.463587000  | -2.632579000 | -3.545392000 |
| C | 2.842858000  | 0.100895000  | -1.134262000 | C               | 5.330250000  | -3.689179000 | -3.668831000 |
| C | 4.230440000  | 0.093007000  | -0.732511000 | H               | 5.735319000  | -4.648933000 | -4.009011000 |
| C | 4.243739000  | 0.039381000  | 0.627424000  | H               | 5.868118000  | -2.892846000 | -4.197295000 |
| C | 2.864412000  | 0.006523000  | 1.054666000  | H               | 5.554503000  | -3.582927000 | -2.603127000 |
| H | 5.069675000  | 0.138236000  | -1.414908000 | C               | 3.594561000  | -3.554847000 | -5.481899000 |
| H | 5.095834000  | 0.027197000  | 1.295094000  | H               | 3.887240000  | -4.503516000 | -5.945736000 |
| C | 2.452215000  | -0.049899000 | 2.379155000  | H               | 2.550285000  | -3.356542000 | -5.741602000 |
| H | 3.223247000  | -0.081624000 | 3.142698000  | H               | 4.200404000  | -2.760356000 | -5.934180000 |
| O | -0.014644000 | -1.717158000 | -0.128522000 | <sup>4</sup> IM |              |              |              |
| S | 0.028077000  | 2.384195000  | 0.020681000  | Fe              | -0.003895000 | 0.001385000  | 0.000951000  |
| H | 0.282476000  | 2.542755000  | 1.338716000  | N               | -0.016229000 | -0.058269000 | 2.017442000  |
| C | 2.427024000  | -3.867798000 | -0.969883000 | C               | 1.076221000  | -0.054212000 | 2.848942000  |
| C | 3.231310000  | -4.678759000 | -1.752855000 | C               | 0.650353000  | -0.189413000 | 4.220003000  |
| C | 2.980342000  | -4.730482000 | -3.237693000 | C               | -0.707014000 | -0.295182000 | 4.202869000  |
| C | 1.515540000  | -4.543336000 | -3.536209000 | C               | -1.115850000 | -0.223332000 | 2.821925000  |
| C | 0.763940000  | -3.735765000 | -2.699355000 | H               | 1.318806000  | -0.210352000 | 5.071325000  |
| N | 1.306437000  | -3.301380000 | -1.518339000 | H               | -1.385053000 | -0.420326000 | 5.037489000  |
| C | -0.660834000 | -3.308765000 | -2.946400000 | C               | -2.430424000 | -0.329946000 | 2.390190000  |
| C | 2.645022000  | -3.574362000 | 0.492820000  | H               | -3.197480000 | -0.454572000 | 3.147817000  |
| C | 0.904286000  | -5.177369000 | -4.722045000 | N               | -2.015100000 | -0.141978000 | -0.019074000 |
| O | -0.188855000 | -4.913841000 | -5.197359000 | C               | -2.837123000 | -0.293116000 | 1.064927000  |
| O | 1.702153000  | -6.147932000 | -5.241420000 | C               | -4.212144000 | -0.384108000 | 0.632067000  |
| C | 1.173078000  | -6.842679000 | -6.390536000 | C               | -4.204869000 | -0.275457000 | -0.723691000 |
| C | 2.207213000  | -7.866091000 | -6.822203000 | C               | -2.825655000 | -0.117222000 | -1.122047000 |
| C | 4.339525000  | -5.448312000 | -1.151332000 | H               | -5.057930000 | -0.509779000 | 1.296030000  |
| O | 4.794482000  | -5.298923000 | -0.028412000 | H               | -5.043507000 | -0.292687000 | -1.408065000 |
| O | 4.807500000  | -6.402191000 | -1.999283000 | C               | -2.406067000 | 0.061380000  | -2.431455000 |

|   |              |              |              |                 |              |              |              |
|---|--------------|--------------|--------------|-----------------|--------------|--------------|--------------|
| H | -3.165787000 | 0.064640000  | -3.206411000 | H               | 5.215708000  | -6.925159000 | -4.594606000 |
| N | 0.003587000  | 0.264927000  | -1.996656000 | H               | 6.485431000  | -5.701105000 | -4.668098000 |
| C | -1.088281000 | 0.241731000  | -2.826634000 | H               | 7.486877000  | -8.013706000 | -4.579038000 |
| C | -0.667222000 | 0.413436000  | -4.195146000 | H               | 7.926621000  | -7.096338000 | -3.124171000 |
| C | 0.689113000  | 0.529724000  | -4.180213000 | H               | 6.646357000  | -8.324083000 | -3.045959000 |
| C | 1.102294000  | 0.426505000  | -2.802447000 | H               | 5.333643000  | -7.502733000 | 3.343825000  |
| H | -1.337298000 | 0.433807000  | -5.045141000 | H               | 6.643843000  | -6.332299000 | 3.516647000  |
| H | 1.364890000  | 0.664152000  | -5.015185000 | H               | 7.566642000  | -8.635004000 | 3.064572000  |
| C | 2.423010000  | 0.454691000  | -2.377543000 | H               | 7.964838000  | -7.539131000 | 1.725769000  |
| H | 3.188972000  | 0.602429000  | -3.132157000 | H               | 6.643911000  | -8.712443000 | 1.549318000  |
| N | 2.017227000  | 0.123280000  | 0.022232000  | H               | 5.431397000  | -2.479376000 | -0.276609000 |
| C | 2.837528000  | 0.317726000  | -1.060602000 | C               | 6.953804000  | -3.456992000 | 0.884965000  |
| C | 4.210115000  | 0.405643000  | -0.627394000 | H               | 7.545237000  | -4.379403000 | 0.894523000  |
| C | 4.204644000  | 0.285018000  | 0.729839000  | H               | 7.652733000  | -2.612132000 | 0.878259000  |
| C | 2.828239000  | 0.124481000  | 1.129205000  | H               | 6.388272000  | -3.403297000 | 1.819921000  |
| H | 5.053275000  | 0.560969000  | -1.288588000 | C               | 6.917638000  | -3.264683000 | -1.617789000 |
| H | 5.042403000  | 0.319941000  | 1.414809000  | H               | 7.509629000  | -4.171906000 | -1.783055000 |
| C | 2.401489000  | 0.035686000  | 2.446596000  | H               | 6.325268000  | -3.074208000 | -2.517543000 |
| H | 3.160960000  | 0.043778000  | 3.221963000  | H               | 7.615740000  | -2.426576000 | -1.504518000 |
| O | 0.054841000  | -1.765391000 | -0.128644000 | <sup>2</sup> IM |              |              |              |
| S | -0.141727000 | 2.324951000  | 0.075600000  | Fe              | -0.004620000 | 0.002034000  | 0.001186000  |
| H | -0.155984000 | 2.471626000  | 1.419041000  | N               | -0.016869000 | -0.057910000 | 2.017631000  |
| C | 2.977839000  | -3.951628000 | 0.839301000  | C               | 1.075658000  | -0.054458000 | 2.849070000  |
| C | 4.188541000  | -4.637329000 | 0.820001000  | C               | 0.649808000  | -0.189705000 | 4.220134000  |
| C | 5.011642000  | -4.613322000 | -0.435009000 | C               | -0.707594000 | -0.294970000 | 4.203059000  |
| C | 4.150349000  | -4.445511000 | -1.652485000 | C               | -1.116477000 | -0.222718000 | 2.822149000  |
| C | 2.943282000  | -3.762836000 | -1.528856000 | H               | 1.318311000  | -0.211081000 | 5.071406000  |
| N | 2.451862000  | -3.429425000 | -0.303508000 | H               | -1.385636000 | -0.420030000 | 5.037691000  |
| C | 2.055670000  | -3.375525000 | -2.687101000 | C               | -2.431097000 | -0.328772000 | 2.390431000  |
| C | 2.123169000  | -3.758839000 | 2.068867000  | H               | -3.198199000 | -0.453288000 | 3.148025000  |
| C | 4.605013000  | -4.964543000 | -2.962338000 | N               | -2.015661000 | -0.140363000 | -0.018818000 |
| O | 4.176981000  | -4.630960000 | -4.054560000 | C               | -2.837756000 | -0.291424000 | 1.065185000  |
| O | 5.567759000  | -5.912367000 | -2.819260000 | C               | -4.212815000 | -0.381542000 | 0.632335000  |
| C | 6.059520000  | -6.495069000 | -4.045653000 | C               | -4.205547000 | -0.272350000 | -0.723384000 |
| C | 7.090829000  | -7.543763000 | -3.672185000 | C               | -2.826295000 | -0.114709000 | -1.121765000 |
| C | 4.686536000  | -5.344299000 | 2.022021000  | H               | -5.058642000 | -0.507007000 | 1.296284000  |
| O | 4.303834000  | -5.169798000 | 3.166808000  | H               | -5.044231000 | -0.288851000 | -1.407720000 |
| O | 5.633156000  | -6.266180000 | 1.706224000  | C               | -2.406745000 | 0.064116000  | -2.431134000 |
| C | 6.163686000  | -7.023244000 | 2.815559000  | H               | -3.166542000 | 0.068136000  | -3.206010000 |
| C | 7.142650000  | -8.036223000 | 2.251098000  | N               | 0.003037000  | 0.265795000  | -1.996432000 |
| C | 6.052214000  | -3.381315000 | -0.355222000 | C               | -1.088867000 | 0.243674000  | -2.826360000 |
| H | 5.614858000  | -5.519088000 | -0.514368000 | C               | -0.667751000 | 0.415364000  | -4.194859000 |
| H | 0.961614000  | -2.159660000 | -0.178302000 | C               | 0.688679000  | 0.530501000  | -4.179974000 |
| H | 2.564112000  | -2.684251000 | -3.364785000 | C               | 1.101845000  | 0.426647000  | -2.802245000 |
| H | 1.791242000  | -4.250719000 | -3.288441000 | H               | -1.337855000 | 0.436473000  | -5.044813000 |
| H | 1.146744000  | -2.909745000 | -2.303071000 | H               | 1.364527000  | 0.664546000  | -5.014950000 |
| H | 1.190888000  | -3.267444000 | 1.786000000  | C               | 2.422603000  | 0.453779000  | -2.377419000 |
| H | 1.901571000  | -4.717033000 | 2.548085000  | H               | 3.188630000  | 0.601012000  | -3.132066000 |
| H | 2.640532000  | -3.155651000 | 2.820221000  | N               | 2.016743000  | 0.122613000  | 0.022365000  |

|   |              |              |              |                 |              |              |              |
|---|--------------|--------------|--------------|-----------------|--------------|--------------|--------------|
| C | 2.837102000  | 0.316521000  | -1.060489000 | C               | 6.953324000  | -3.455988000 | 0.884320000  |
| C | 4.209757000  | 0.403694000  | -0.627328000 | H               | 7.544875000  | -4.378311000 | 0.894436000  |
| C | 4.204247000  | 0.283179000  | 0.729920000  | H               | 7.652167000  | -2.611064000 | 0.877213000  |
| C | 2.827756000  | 0.123398000  | 1.129303000  | H               | 6.387667000  | -3.401847000 | 1.819174000  |
| H | 5.052978000  | 0.558550000  | -1.288553000 | C               | 6.917083000  | -3.264304000 | -1.618417000 |
| H | 5.042030000  | 0.317681000  | 1.414880000  | H               | 7.509873000  | -4.171042000 | -1.783328000 |
| C | 2.400956000  | 0.034778000  | 2.446704000  | H               | 6.324792000  | -3.074628000 | -2.518357000 |
| H | 3.160433000  | 0.042449000  | 3.222070000  | H               | 7.614486000  | -2.425613000 | -1.505409000 |
| O | 0.054379000  | -1.765030000 | -0.128419000 | <sup>4</sup> PC |              |              |              |
| S | -0.140036000 | 2.325734000  | 0.076071000  | Fe              | -0.005223000 | 0.005850000  | -0.003206000 |
| H | -0.154223000 | 2.472224000  | 1.419533000  | N               | -0.018166000 | 0.069408000  | 2.013280000  |
| C | 2.977428000  | -3.953519000 | 0.838861000  | C               | 1.073698000  | 0.119687000  | 2.844137000  |
| C | 4.188873000  | -4.637876000 | 0.819837000  | C               | 0.645545000  | 0.081772000  | 4.220354000  |
| C | 5.011888000  | -4.613734000 | -0.435263000 | C               | -0.712934000 | -0.013063000 | 4.208729000  |
| C | 4.150445000  | -4.446926000 | -1.652832000 | C               | -1.120540000 | -0.029367000 | 2.825972000  |
| C | 2.942527000  | -3.765562000 | -1.529305000 | H               | 1.313069000  | 0.112959000  | 5.072098000  |
| N | 2.450274000  | -3.433016000 | -0.304199000 | H               | -1.392472000 | -0.074943000 | 5.049197000  |
| C | 2.054815000  | -3.379074000 | -2.687727000 | C               | -2.436522000 | -0.143467000 | 2.400699000  |
| C | 2.122821000  | -3.760677000 | 2.068472000  | H               | -3.204984000 | -0.210872000 | 3.164127000  |
| C | 4.605779000  | -4.965606000 | -2.962615000 | N               | -2.020064000 | -0.097416000 | -0.015167000 |
| O | 4.178168000  | -4.631845000 | -4.054951000 | C               | -2.843725000 | -0.174581000 | 1.075354000  |
| O | 5.568959000  | -5.912946000 | -2.819326000 | C               | -4.220524000 | -0.262907000 | 0.647947000  |
| C | 6.061622000  | -6.495078000 | -4.045640000 | C               | -4.212391000 | -0.226957000 | -0.711742000 |
| C | 7.092950000  | -7.543657000 | -3.671889000 | C               | -2.830782000 | -0.117342000 | -1.117825000 |
| C | 4.687505000  | -5.344021000 | 2.022105000  | H               | -5.067991000 | -0.336439000 | 1.317563000  |
| O | 4.304983000  | -5.169102000 | 3.166884000  | H               | -5.051805000 | -0.264939000 | -1.394315000 |
| O | 5.634214000  | -6.265862000 | 1.706504000  | C               | -2.408198000 | -0.023655000 | -2.435129000 |
| C | 6.165124000  | -7.022367000 | 2.816041000  | H               | -3.168205000 | -0.048332000 | -3.209431000 |
| C | 7.143459000  | -8.036022000 | 2.251699000  | N               | 0.006475000  | 0.147894000  | -2.012198000 |
| C | 6.051691000  | -3.381162000 | -0.355965000 | C               | -1.086935000 | 0.101204000  | -2.839498000 |
| H | 5.615681000  | -5.519166000 | -0.514354000 | C               | -0.663471000 | 0.179115000  | -4.215729000 |
| H | 0.960594000  | -2.159933000 | -0.178587000 | C               | 0.695324000  | 0.262582000  | -4.207693000 |
| H | 2.562267000  | -2.685914000 | -3.364266000 | C               | 1.107546000  | 0.233992000  | -2.826228000 |
| H | 1.792624000  | -4.254093000 | -3.290252000 | H               | -1.334049000 | 0.164225000  | -5.065444000 |
| H | 1.144750000  | -2.915466000 | -2.303734000 | H               | 1.373171000  | 0.329721000  | -5.049081000 |
| H | 1.189722000  | -3.271030000 | 1.785256000  | C               | 2.428924000  | 0.260027000  | -2.402976000 |
| H | 1.902905000  | -4.718550000 | 2.549071000  | H               | 3.197676000  | 0.343985000  | -3.164503000 |
| H | 2.639479000  | -3.155613000 | 2.818830000  | N               | 2.016363000  | 0.091427000  | 0.012884000  |
| H | 5.218238000  | -6.925138000 | -4.595266000 | C               | 2.840680000  | 0.199243000  | -1.079706000 |
| H | 6.487744000  | -5.700780000 | -4.667516000 | C               | 4.214551000  | 0.291961000  | -0.651711000 |
| H | 7.489713000  | -8.013173000 | -4.578648000 | C               | 4.206963000  | 0.266596000  | 0.710076000  |
| H | 7.928267000  | -7.096204000 | -3.123172000 | C               | 2.827965000  | 0.156491000  | 1.118157000  |
| H | 6.648269000  | -8.324303000 | -3.046223000 | H               | 5.061165000  | 0.383269000  | -1.320238000 |
| H | 5.335222000  | -7.501210000 | 3.345102000  | H               | 5.046729000  | 0.333197000  | 1.390106000  |
| H | 6.645916000  | -6.331102000 | 3.516386000  | C               | 2.400212000  | 0.165447000  | 2.437758000  |
| H | 7.567818000  | -8.634311000 | 3.065341000  | H               | 3.159822000  | 0.217646000  | 3.211284000  |
| H | 7.965441000  | -7.539523000 | 1.725481000  | O               | 0.010310000  | -1.769332000 | -0.028672000 |
| H | 6.644103000  | -8.712624000 | 1.550726000  | S               | -0.103438000 | 2.331285000  | -0.070171000 |
| H | 5.430439000  | -2.479483000 | -0.277566000 | H               | -0.173463000 | 2.558128000  | 1.260295000  |



|                 |              |              |              |   |              |              |              |
|-----------------|--------------|--------------|--------------|---|--------------|--------------|--------------|
| C               | 2.618959000  | -4.085679000 | 1.416151000  | C | 1.073698000  | 0.119687000  | 2.844137000  |
| C               | 3.721138000  | -4.956546000 | 1.591594000  | C | 0.645545000  | 0.081772000  | 4.220354000  |
| C               | 4.438955000  | -5.338183000 | 0.457244000  | C | -0.712934000 | -0.013063000 | 4.208729000  |
| C               | 4.072629000  | -4.887183000 | -0.811670000 | C | -1.120540000 | -0.029367000 | 2.825972000  |
| C               | 2.954504000  | -4.025154000 | -0.910216000 | H | 1.313069000  | 0.112959000  | 5.072098000  |
| N               | 2.287076000  | -3.641323000 | 0.191662000  | H | -1.392472000 | -0.074943000 | 5.049197000  |
| C               | 2.418190000  | -3.490737000 | -2.210883000 | C | -2.436522000 | -0.143467000 | 2.400699000  |
| C               | 1.739247000  | -3.609187000 | 2.540421000  | H | -3.204984000 | -0.210872000 | 3.164127000  |
| C               | 4.847666000  | -5.311740000 | -2.012948000 | N | -2.020064000 | -0.097416000 | -0.015167000 |
| O               | 4.603916000  | -4.992397000 | -3.160789000 | C | -2.843725000 | -0.174581000 | 1.075354000  |
| O               | 5.889458000  | -6.114552000 | -1.685970000 | C | -4.220524000 | -0.262907000 | 0.647947000  |
| C               | 6.689450000  | -6.587938000 | -2.793673000 | C | -4.212391000 | -0.226957000 | -0.711742000 |
| C               | 7.771392000  | -7.486309000 | -2.224240000 | C | -2.830782000 | -0.117342000 | -1.117825000 |
| C               | 4.117525000  | -5.465203000 | 2.936348000  | H | -5.067991000 | -0.336439000 | 1.317563000  |
| O               | 3.531485000  | -5.242448000 | 3.978271000  | H | -5.051805000 | -0.264939000 | -1.394315000 |
| O               | 5.237223000  | -6.226969000 | 2.878993000  | C | -2.408198000 | -0.023655000 | -2.435129000 |
| C               | 5.683079000  | -6.784392000 | 4.136567000  | H | -3.168205000 | -0.048332000 | -3.209431000 |
| C               | 6.931798000  | -7.599488000 | 3.857117000  | N | 0.006475000  | 0.147894000  | -2.012198000 |
| C               | 7.176061000  | -2.581163000 | 0.875849000  | C | -1.086935000 | 0.101204000  | -2.839498000 |
| H               | 5.287139000  | -6.000506000 | 0.562090000  | C | -0.663471000 | 0.179115000  | -4.215729000 |
| H               | 0.895698000  | -2.202610000 | 0.034948000  | C | 0.695324000  | 0.262582000  | -4.207693000 |
| H               | 3.153863000  | -2.851624000 | -2.709056000 | C | 1.107546000  | 0.233992000  | -2.826228000 |
| H               | 2.204300000  | -4.304429000 | -2.909601000 | H | -1.334049000 | 0.164225000  | -5.065444000 |
| H               | 1.509725000  | -2.918765000 | -2.017827000 | H | 1.373171000  | 0.329721000  | -5.049081000 |
| H               | 0.947439000  | -2.977144000 | 2.136586000  | C | 2.428924000  | 0.260027000  | -2.402976000 |
| H               | 1.300215000  | -4.456946000 | 3.074875000  | H | 3.197676000  | 0.343985000  | -3.164503000 |
| H               | 2.313648000  | -3.051019000 | 3.285825000  | N | 2.016363000  | 0.091427000  | 0.012884000  |
| H               | 6.038251000  | -7.119849000 | -3.494360000 | C | 2.840680000  | 0.199243000  | -1.079706000 |
| H               | 7.106145000  | -5.723519000 | -3.320064000 | C | 4.214551000  | 0.291961000  | -0.651711000 |
| H               | 8.399901000  | -7.868023000 | -3.036199000 | C | 4.206963000  | 0.266596000  | 0.710076000  |
| H               | 8.409808000  | -6.937219000 | -1.524473000 | C | 2.827965000  | 0.156491000  | 1.118157000  |
| H               | 7.334607000  | -8.340521000 | -1.696764000 | H | 5.061165000  | 0.383269000  | -1.320238000 |
| H               | 4.876733000  | -7.395541000 | 4.554354000  | H | 5.046729000  | 0.333197000  | 1.390106000  |
| H               | 5.873499000  | -5.964795000 | 4.836402000  | C | 2.400212000  | 0.165447000  | 2.437758000  |
| H               | 7.299453000  | -8.043535000 | 4.788617000  | H | 3.159822000  | 0.217646000  | 3.211284000  |
| H               | 7.725157000  | -6.971310000 | 3.439129000  | O | 0.010310000  | -1.769332000 | -0.028672000 |
| H               | 6.722253000  | -8.408503000 | 3.149811000  | S | -0.103438000 | 2.331285000  | -0.070171000 |
| H               | 6.240023000  | -2.053901000 | 0.704926000  | H | -0.173463000 | 2.558128000  | 1.260295000  |
| C               | 7.472431000  | -3.079247000 | 2.252255000  | C | 2.618959000  | -4.085679000 | 1.416151000  |
| H               | 7.071426000  | -4.095754000 | 2.422441000  | C | 3.721138000  | -4.956546000 | 1.591594000  |
| H               | 8.554835000  | -3.139980000 | 2.434864000  | C | 4.438955000  | -5.338183000 | 0.457244000  |
| H               | 7.034951000  | -2.434778000 | 3.023979000  | C | 4.072629000  | -4.887183000 | -0.811670000 |
| C               | 7.930134000  | -3.087742000 | -0.309422000 | C | 2.954504000  | -4.025154000 | -0.910216000 |
| H               | 7.804834000  | -2.436279000 | -1.182521000 | N | 2.287076000  | -3.641323000 | 0.191662000  |
| H               | 9.005778000  | -3.170375000 | -0.098793000 | C | 2.418190000  | -3.490737000 | -2.210883000 |
| H               | 7.594287000  | -4.096138000 | -0.615241000 | C | 1.739247000  | -3.609187000 | 2.540421000  |
| <sup>2</sup> PC |              |              |              | C | 4.847666000  | -5.311740000 | -2.012948000 |
| Fe              | -0.005223000 | 0.005850000  | -0.003206000 | O | 4.603916000  | -4.992397000 | -3.160789000 |
| N               | -0.018166000 | 0.069408000  | 2.013280000  | O | 5.889458000  | -6.114552000 | -1.685970000 |

|   |             |              |              |
|---|-------------|--------------|--------------|
| C | 6.689450000 | -6.587938000 | -2.793673000 |
| C | 7.771392000 | -7.486309000 | -2.224240000 |
| C | 4.117525000 | -5.465203000 | 2.936348000  |
| O | 3.531485000 | -5.242448000 | 3.978271000  |
| O | 5.237223000 | -6.226969000 | 2.878993000  |
| C | 5.683079000 | -6.784392000 | 4.136567000  |
| C | 6.931798000 | -7.599488000 | 3.857117000  |
| C | 7.176061000 | -2.581163000 | 0.875849000  |
| H | 5.287139000 | -6.000506000 | 0.562090000  |
| H | 0.895698000 | -2.202610000 | 0.034948000  |
| H | 3.153863000 | -2.851624000 | -2.709056000 |
| H | 2.204300000 | -4.304429000 | -2.909601000 |
| H | 1.509725000 | -2.918765000 | -2.017827000 |
| H | 0.947439000 | -2.977144000 | 2.136586000  |
| H | 1.300215000 | -4.456946000 | 3.074875000  |
| H | 2.313648000 | -3.051019000 | 3.285825000  |
| H | 6.038251000 | -7.119849000 | -3.494360000 |
| H | 7.106145000 | -5.723519000 | -3.320064000 |
| H | 8.399901000 | -7.868023000 | -3.036199000 |
| H | 8.409808000 | -6.937219000 | -1.524473000 |
| H | 7.334607000 | -8.340521000 | -1.696764000 |
| H | 4.876733000 | -7.395541000 | 4.554354000  |
| H | 5.873499000 | -5.964795000 | 4.836402000  |
| H | 7.299453000 | -8.043535000 | 4.788617000  |
| H | 7.725157000 | -6.971310000 | 3.439129000  |
| H | 6.722253000 | -8.408503000 | 3.149811000  |
| H | 6.240023000 | -2.053901000 | 0.704926000  |
| C | 7.472431000 | -3.079247000 | 2.252255000  |
| H | 7.071426000 | -4.095754000 | 2.422441000  |
| H | 8.554835000 | -3.139980000 | 2.434864000  |
| H | 7.034951000 | -2.434778000 | 3.023979000  |
| C | 7.930134000 | -3.087742000 | -0.309422000 |
| H | 7.804834000 | -2.436279000 | -1.182521000 |
| H | 9.005778000 | -3.170375000 | -0.098793000 |
| H | 7.594287000 | -4.096138000 | -0.615241000 |
